# Supplementary material for: Bioactive Polyoxygenated Steroids from the South China Sea Soft Coral, Sarcophyton sp
Source: PubMed Central journal article supplement (PMC3705369; doi:10.3390/md11030775), 2013-03-11

# Supplementary Materials

## Index

|   |                                                                                |       |
|---|--------------------------------------------------------------------------------|-------|
| 1 | Index                                                                          | 1–2   |
| 2 | Spectra of the new compound 1.                                                 | 3–9   |
|   | Figure S1. HR-ESIMS spectrum of the new compound 1                             | 3     |
|   | Figure S2. <sup>1</sup> H NMR spectrum of the new compound 1                   | 3     |
|   | Figure S3. <sup>13</sup> C NMR spectrum of the new compound 1                  | 4     |
|   | Figure S4. DEPT spectrum of the new compound 1                                 | 4     |
|   | Figure S5. HSQC spectrum of the new compound 1                                 | 5     |
|   | Figure S6. <sup>1</sup> H- <sup>1</sup> H COSY spectrum of the new compound 1  | 6     |
|   | Figure S7. HMBC spectrum of the new compound 1                                 | 7     |
|   | Figure S8. NOESY spectrum of the new compound 1                                | 8     |
| 3 | Spectra of the new compound 2                                                  | 9–14  |
|   | Figure S9. HR-ESIMS spectrum of the new compound 2                             | 9     |
|   | Figure S10. <sup>1</sup> H NMR spectrum of the new compound 2                  | 9     |
|   | Figure S11. <sup>13</sup> C NMR spectrum of the new compound 2                 | 10    |
|   | Figure S12. DEPT spectrum of the new compound 2                                | 10    |
|   | Figure S13. HSQC spectrum of the new compound 2                                | 11    |
|   | Figure S14. <sup>1</sup> H- <sup>1</sup> H COSY spectrum of the new compound 2 | 12    |
|   | Figure S15. HMBC spectrum of the new compound 2                                | 13    |
|   | Figure S16. NOESY spectrum of the new compound 2                               | 14    |
| 4 | Spectra of the new compound 3                                                  | 15–20 |
|   | Figure S17. HR-ESIMS spectrum of the new compound 3                            | 15    |
|   | Figure S18. <sup>1</sup> H NMR spectrum of the new compound 3                  | 15    |
|   | Figure S19. <sup>13</sup> C NMR spectrum of the new compound 3                 | 16    |
|   | Figure S20. DEPT spectrum of the new compound 3                                | 16    |
|   | Figure S21. HSQC spectrum of the new compound 3                                | 17    |
|   | Figure S22. <sup>1</sup> H- <sup>1</sup> H COSY spectrum of the new compound 3 | 18    |
|   | Figure S23. HMBC spectrum of the new compound 3                                | 19    |
|   | Figure S24. NOESY spectrum of the new compound 3                               | 20    |
| 5 | Spectra of the new compound 4                                                  | 21–26 |
|   | Figure S25. HR-ESIMS spectrum of the new compound 4                            | 21    |
|   | Figure S26. <sup>1</sup> H NMR spectrum of the new compound 4                  | 21    |
|   | Figure S27. <sup>13</sup> C NMR spectrum of the new compound 4                 | 22    |
|   | Figure S28. DEPT spectrum of the new compound 4                                | 22    |
|   | Figure S29. HSQC spectrum of the new compound 4                                | 23    |
|   | Figure S30. <sup>1</sup> H- <sup>1</sup> H COSY spectrum of the new compound 4 | 24    |
|   | Figure S31. HMBC spectrum of the new compound 4                                | 25    |
|   | Figure S32. NOESY spectrum of the new compound 4                               | 26    |
| 6 | Spectra of the new compound 5                                                  | 27–32 |
|   | Figure S33. HR-ESIMS spectrum of the new compound 5                            | 27    |
|   | Figure S34. <sup>1</sup> H NMR spectrum of the new compound 5                  | 27    |

|          |                                                                                           |       |
|----------|-------------------------------------------------------------------------------------------|-------|
|          | <b>Figure S35.</b> $^{13}\text{C}$ NMR spectrum of the new compound <b>5</b>              | 28    |
|          | <b>Figure S36.</b> DEPT spectrum (1) of the new compound <b>5</b>                         | 28    |
|          | <b>Figure S37.</b> DEPT spectrum (2) of the new compound <b>5</b>                         | 29    |
|          | <b>Figure S38.</b> $^1\text{H}$ - $^1\text{H}$ COSY spectrum of the new compound <b>5</b> | 29    |
|          | <b>Figure S39.</b> HSQC spectrum of the new compound <b>5</b>                             | 30    |
|          | <b>Figure S40.</b> HMBC spectrum of the new compound <b>5</b>                             | 31    |
|          | <b>Figure S41.</b> NOESY spectrum of the new compound <b>5</b>                            | 32    |
| <b>7</b> | Spectra of the new compound <b>6</b>                                                      | 33–38 |
|          | <b>Figure S42.</b> HR-ESIMS spectrum of the new compound <b>6</b>                         | 33    |
|          | <b>Figure S43.</b> $^1\text{H}$ NMR spectrum of the new compound <b>6</b>                 | 33    |
|          | <b>Figure S44.</b> $^{13}\text{C}$ NMR spectrum of the new compound <b>6</b>              | 34    |
|          | <b>Figure S45.</b> DEPT spectrum of the new compound <b>6</b>                             | 34    |
|          | <b>Figure S46.</b> HSQC spectrum of the new compound <b>6</b>                             | 35    |
|          | <b>Figure S47.</b> $^1\text{H}$ - $^1\text{H}$ COSY spectrum of the new compound <b>6</b> | 36    |
|          | <b>Figure S48.</b> HMBC spectrum of the new compound <b>6</b>                             | 37    |
|          | <b>Figure S49.</b> NOESY spectrum of the new compound <b>6</b>                            | 38    |
| <b>8</b> | Spectra of the new compound <b>7</b>                                                      | 39–44 |
|          | <b>Figure S50.</b> HR-ESIMS spectrum of the new compound <b>7</b>                         | 39    |
|          | <b>Figure S51.</b> $^1\text{H}$ NMR spectrum of the new compound <b>7</b>                 | 39    |
|          | <b>Figure S52.</b> $^{13}\text{C}$ NMR spectrum of the new compound <b>7</b>              | 40    |
|          | <b>Figure S53.</b> DEPT spectrum of the new compound <b>7</b>                             | 40    |
|          | <b>Figure S54.</b> HSQC spectrum of the new compound <b>7</b>                             | 41    |
|          | <b>Figure S55.</b> $^1\text{H}$ - $^1\text{H}$ COSY spectrum of the new compound <b>7</b> | 42    |
|          | <b>Figure S56.</b> HMBC spectrum of the new compound <b>7</b>                             | 43    |
|          | <b>Figure S57.</b> NOESY spectrum of the new compound <b>7</b>                            | 44    |

**Figure S1.** HR-ESIMS spectrum of the new compound 1.

**Elemental Composition Report**

Page 1

**Multiple Mass Analysis: 2 mass(es) processed - displaying only valid results**

Tolerance = 10.0 PPM / DBE: min = -4.5, max = 50.0

Isotope cluster parameters: Separation = 1.0 Abundance = 1.0%

Monoisotopic Mass, Odd and Even Electron Ions

35 formula(e) evaluated with 2 results within limits (up to 50 closest results for each mass)

SIPI Q-ToF micro 22-May-2009,13:49:12  
 Sa-19 M.W=476 YA019 0.00000000  
 Q090790H 17 (0.588) AM (Cen,6, 80.00, Ar,5000.0,524.19,0.70); Sm (SG, 2x3.00); Cm (1:27) TOF MS ES+ 1.01e5

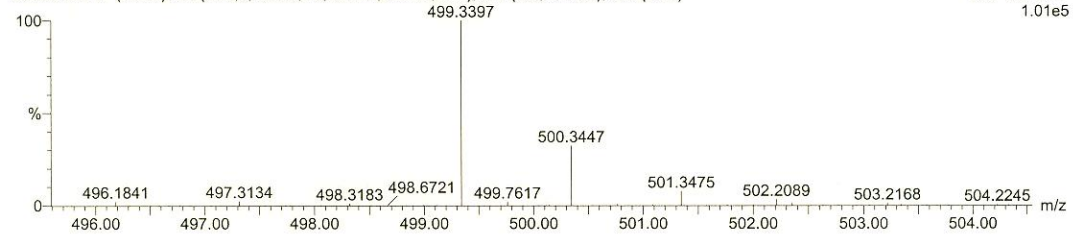

Minimum: 20.00  
 Maximum: 100.00

| Mass     | RA     | Calc. Mass | mDa  | PPM  | DBE | Score | Formula       |
|----------|--------|------------|------|------|-----|-------|---------------|
| 499.3397 | 100.00 | 499.3399   | -0.2 | -0.5 | 5.5 | 1     | C29 H48 O5 Na |
| 500.3447 | 32.34  | 500.3478   | -3.1 | -6.1 | 5.0 | 1     | C29 H49 O5 Na |

**Figure S2.** <sup>1</sup>H MNR (400 MHz, CDCl<sub>3</sub>) spectrum of the new compound 1.

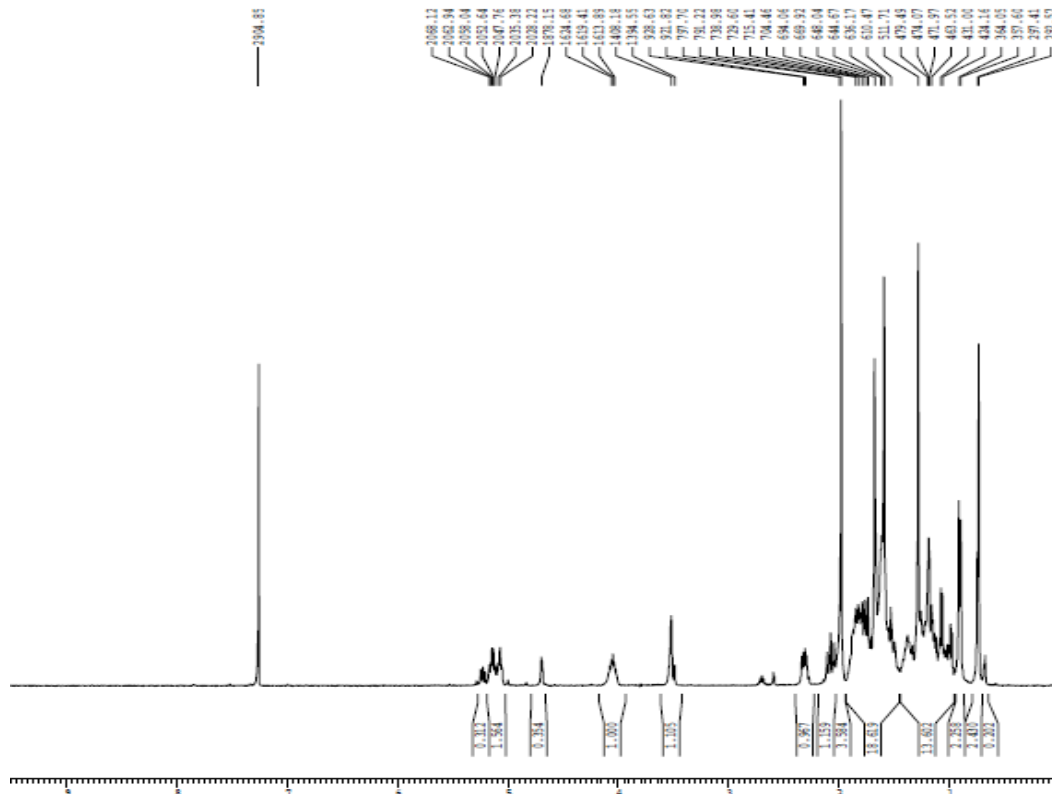

**Figure S3.**  $^{13}\text{C}$  MNR (100 MHz,  $\text{CDCl}_3$ ) spectrum of the new compound **1**.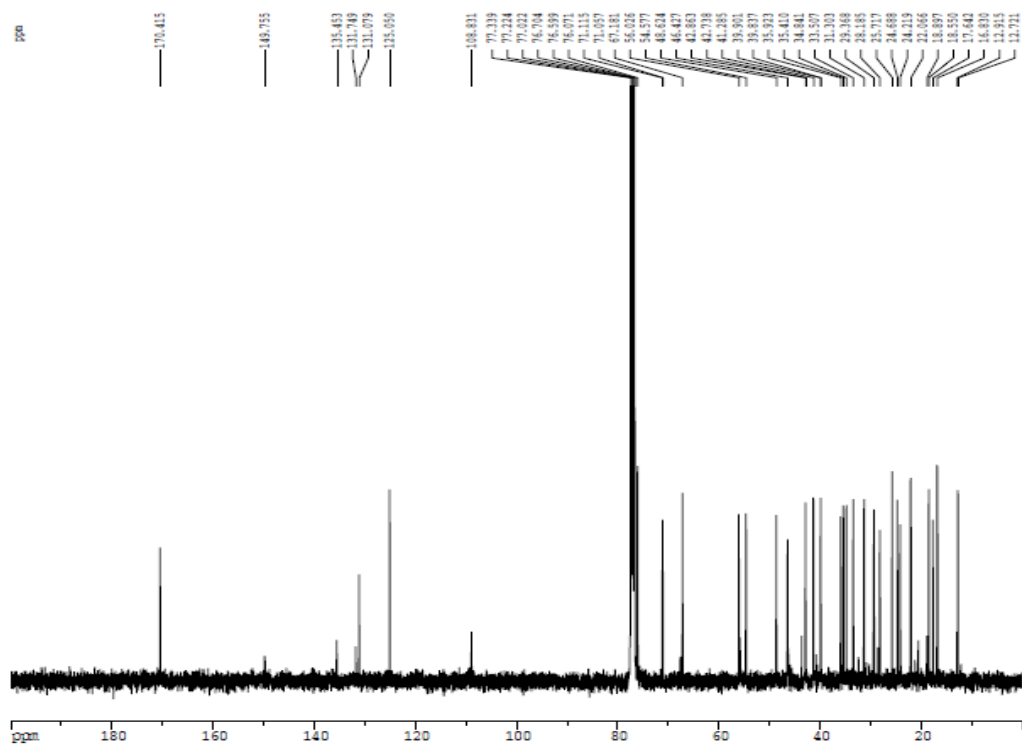**Figure S4.** DEPT (100 MHz,  $\text{CDCl}_3$ ) spectrum of the new compound **1**.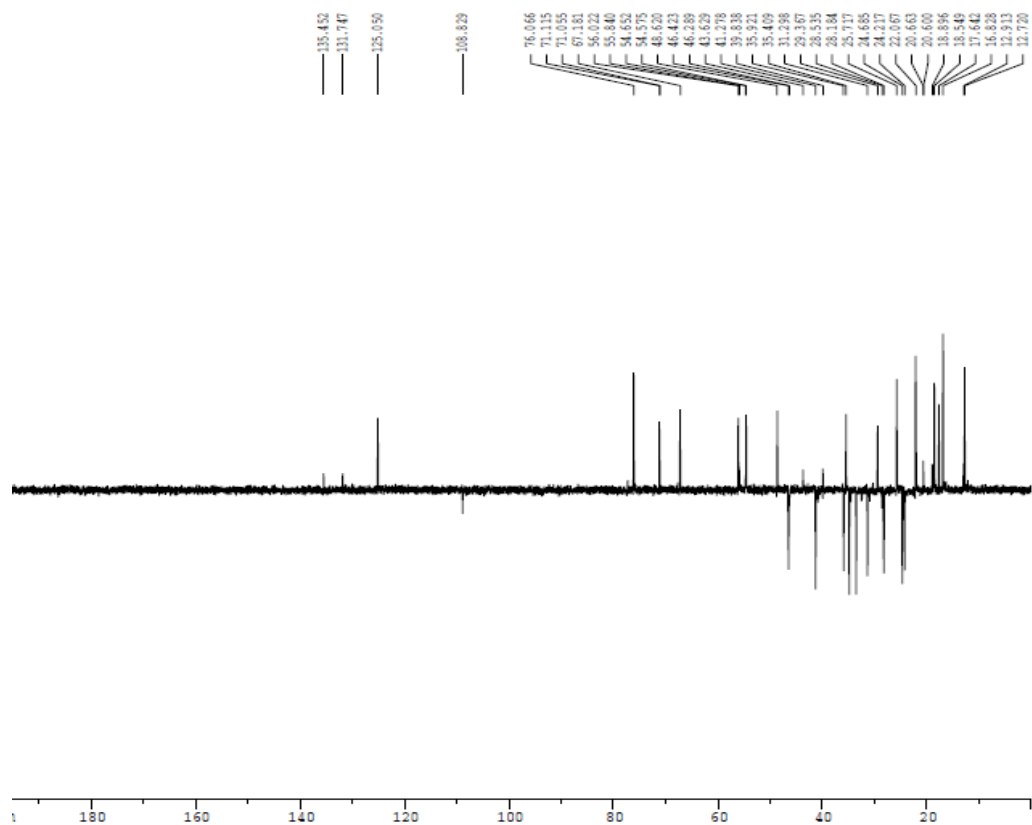

Figure S5. HSQC spectrum of the new compound 1.

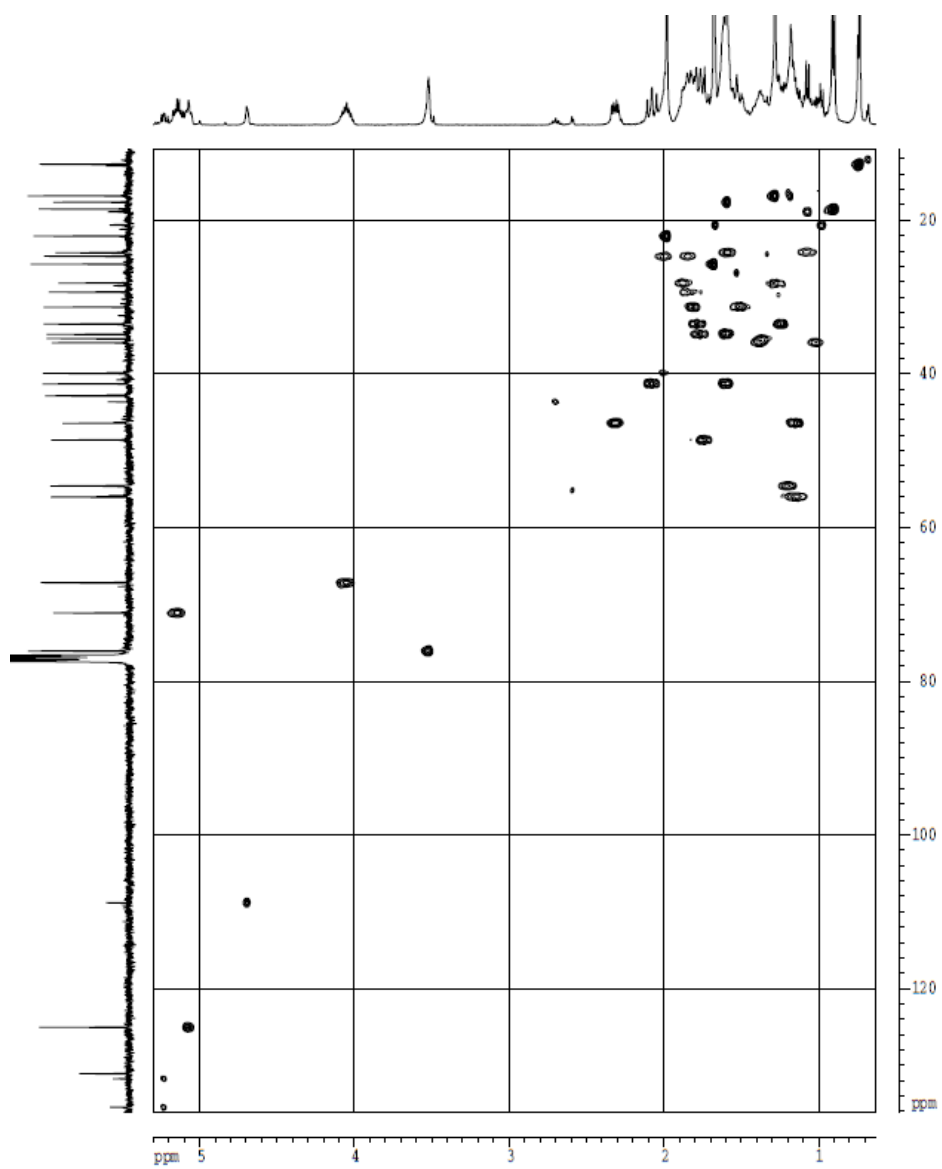

Figure S6.  $^1\text{H}$ - $^1\text{H}$  COSY spectrum of the new compound 1

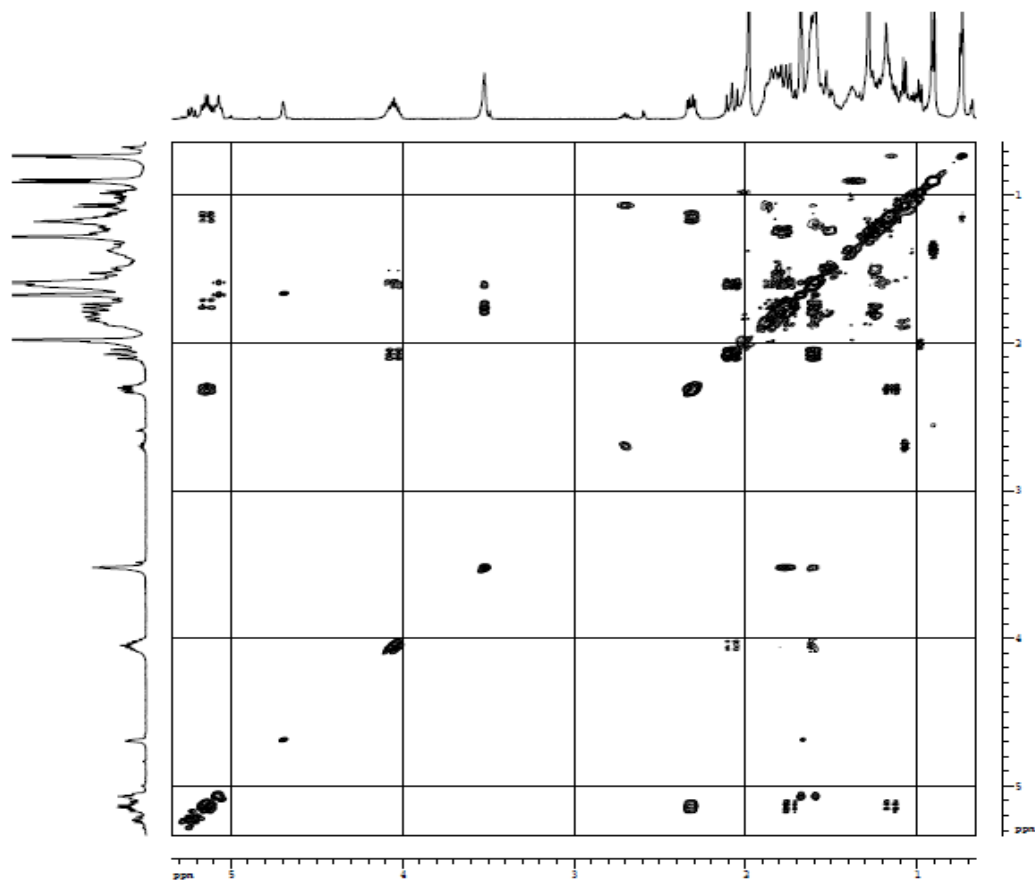

Figure S7. HMBC spectrum of the new compound 1.

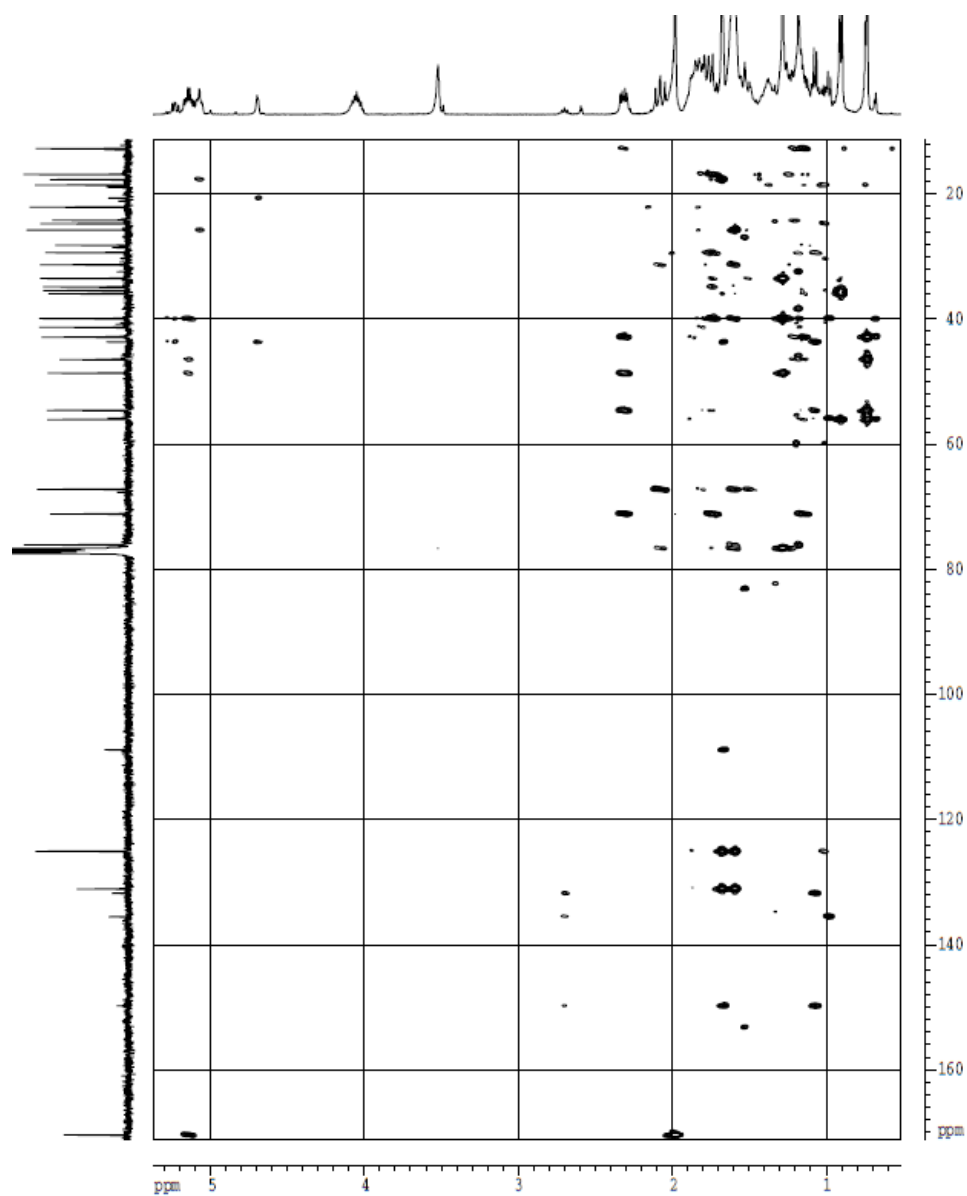

**Figure S8.** NOESY spectrum of the new compound **1**.

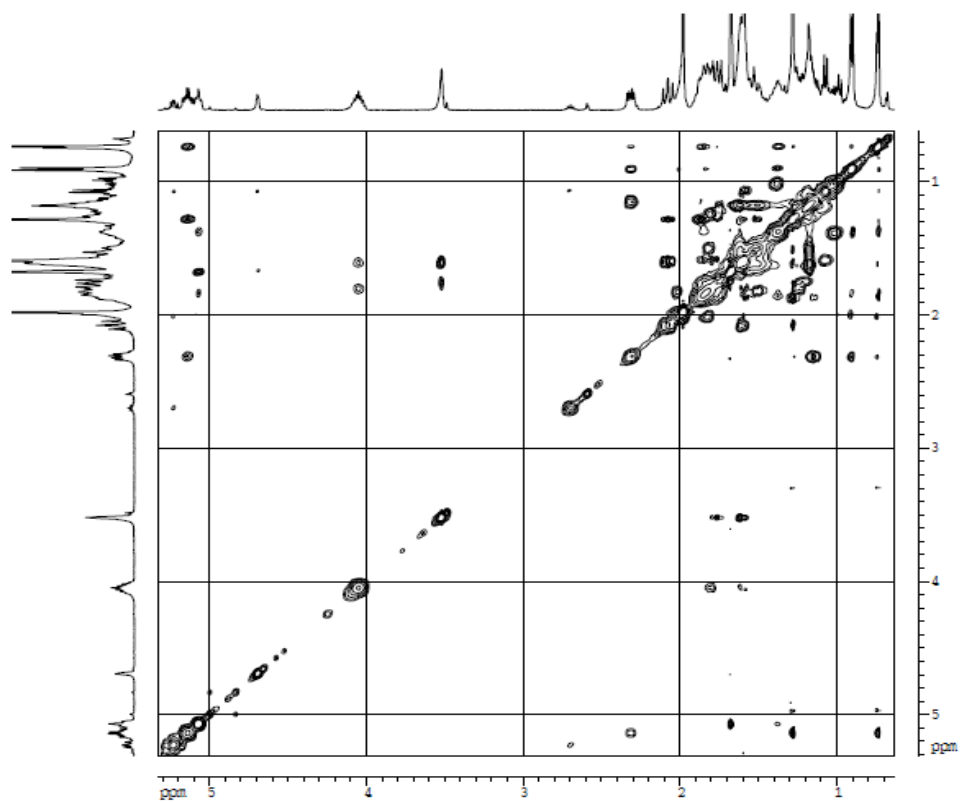





**Figure S11.**  $^{13}\text{C}$  MNR (100 MHz,  $\text{CDCl}_3$ ) spectrum of the new compound 2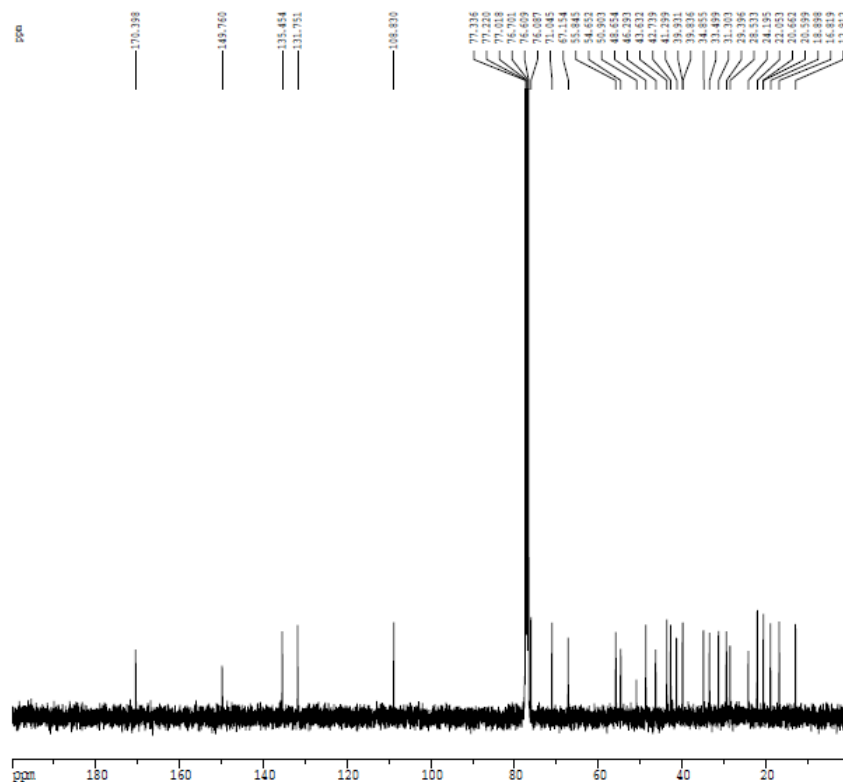**Figure S12.** DEPT (100 MHz,  $\text{CDCl}_3$ ) spectrum of the new compound 2.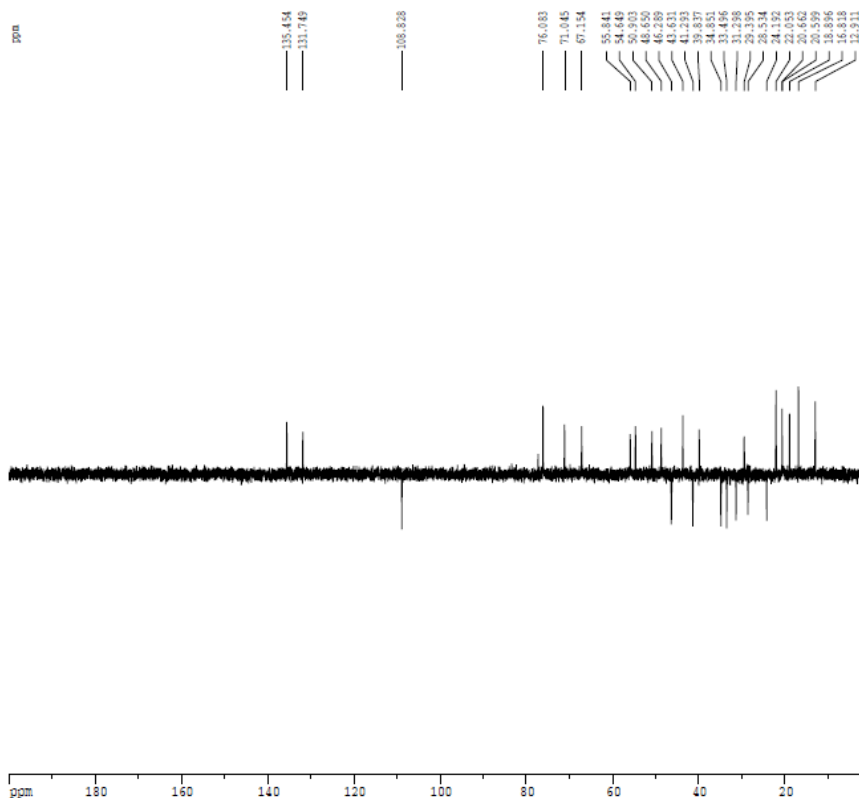

Figure S13. HSQC spectrum of the new compound 2.

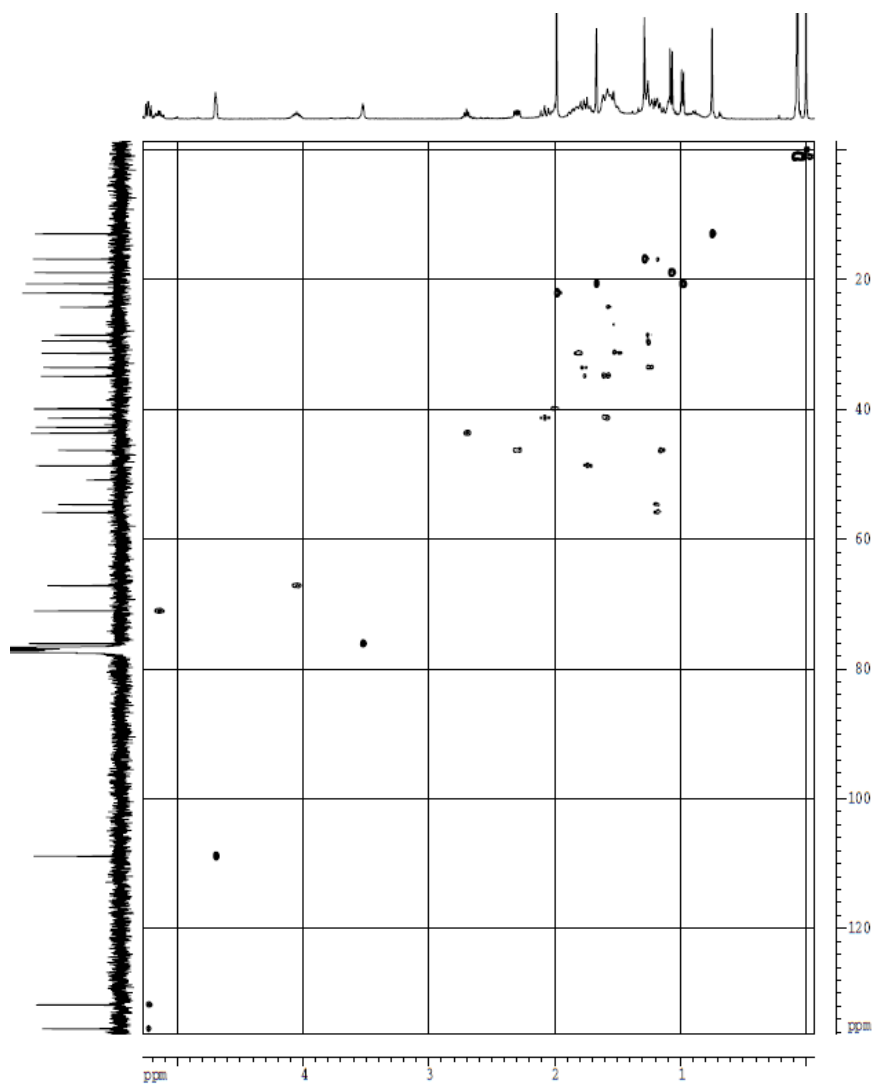

Figure S14.  $^1\text{H}$ - $^1\text{H}$  COSY spectrum of the new compound 2.

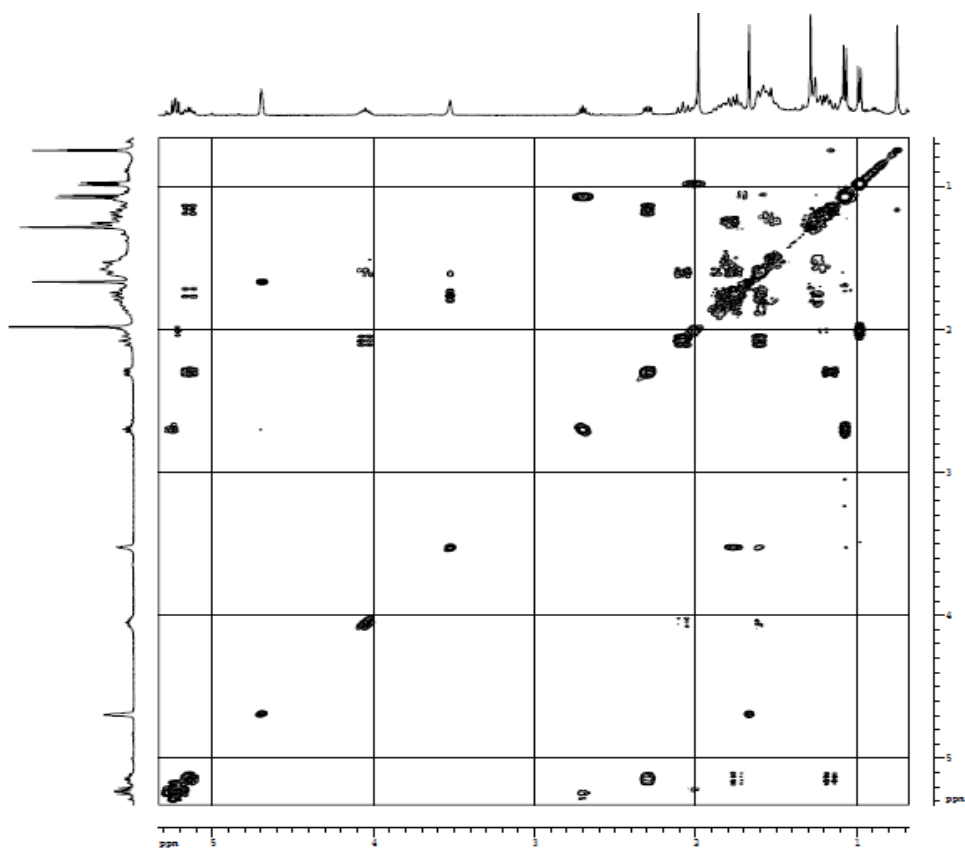

Figure S15. HMBC spectrum of the new compound 2.

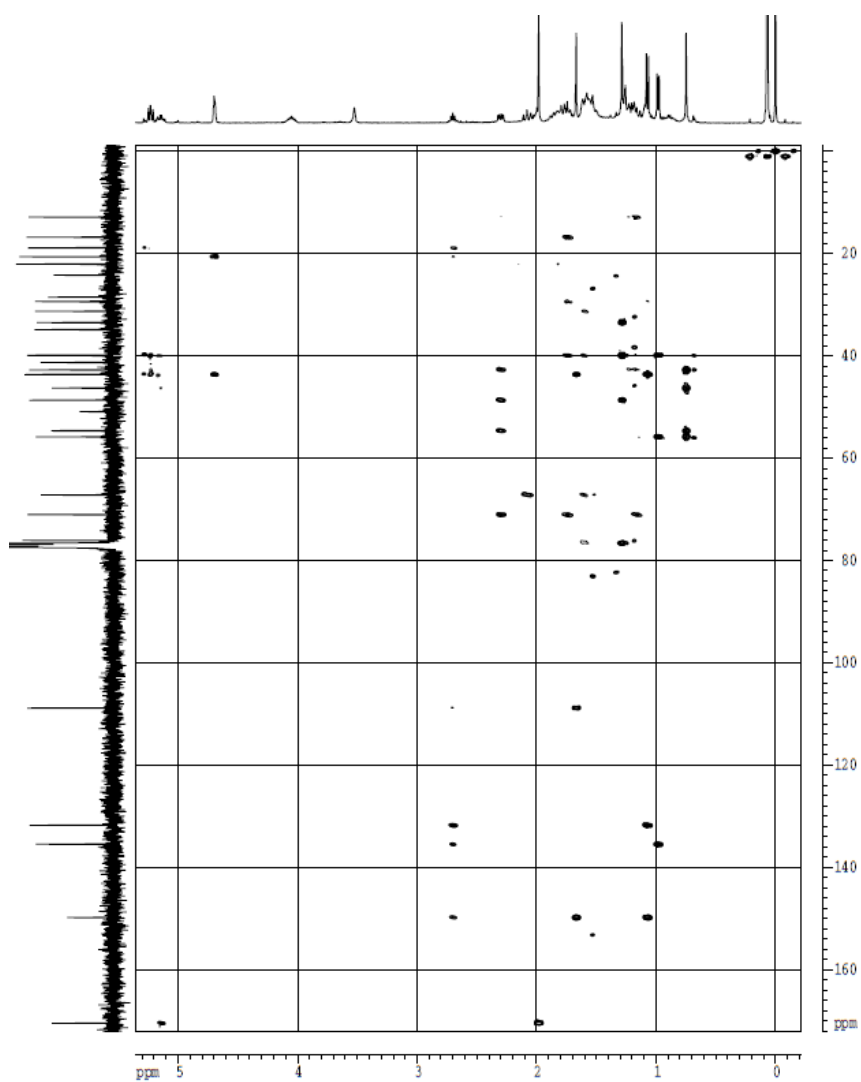

Figure S16. NOESY spectrum of the new compound 2.

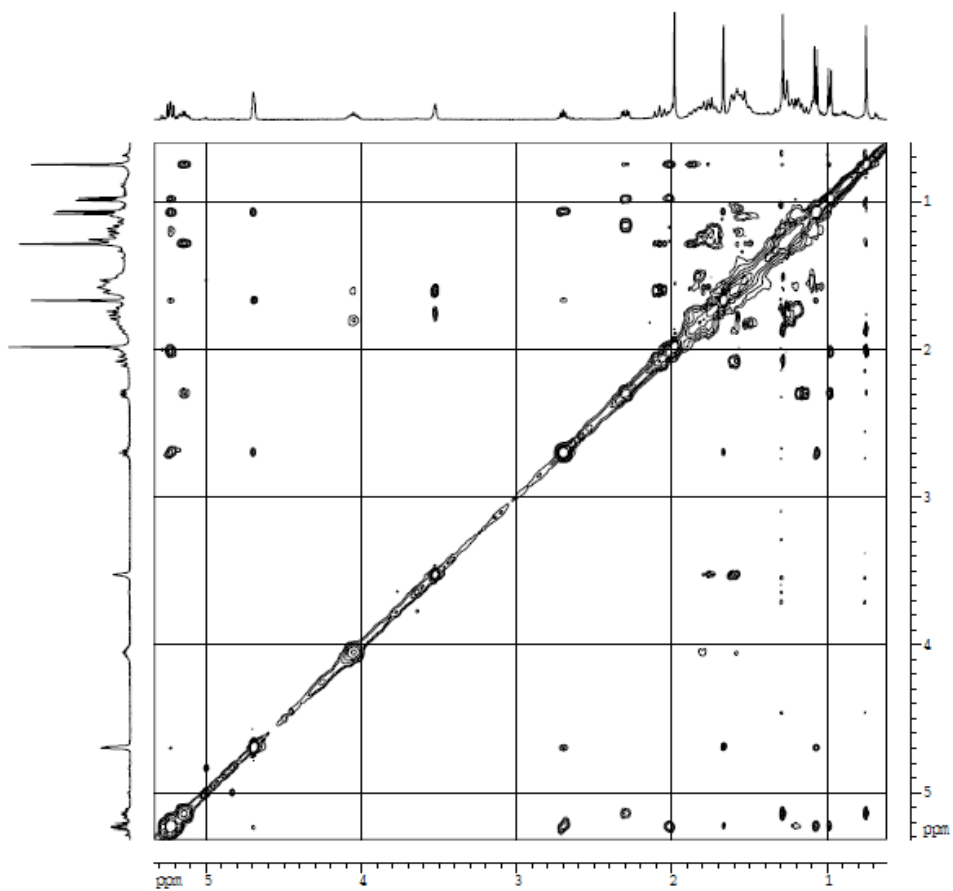



**Figure S19.**  $^{13}\text{C}$  MNR (125 MHz,  $\text{CDCl}_3$ ) spectrum of the new compound **3**.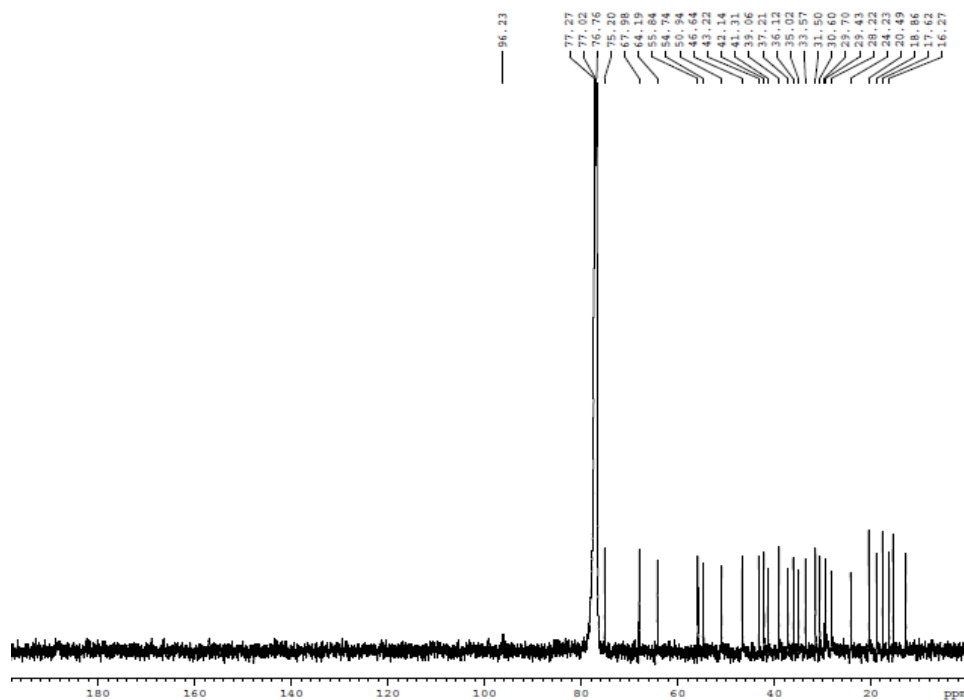**Figure S20.** DEPT (125 MHz,  $\text{CDCl}_3$ ) spectrum of the new compound **3**.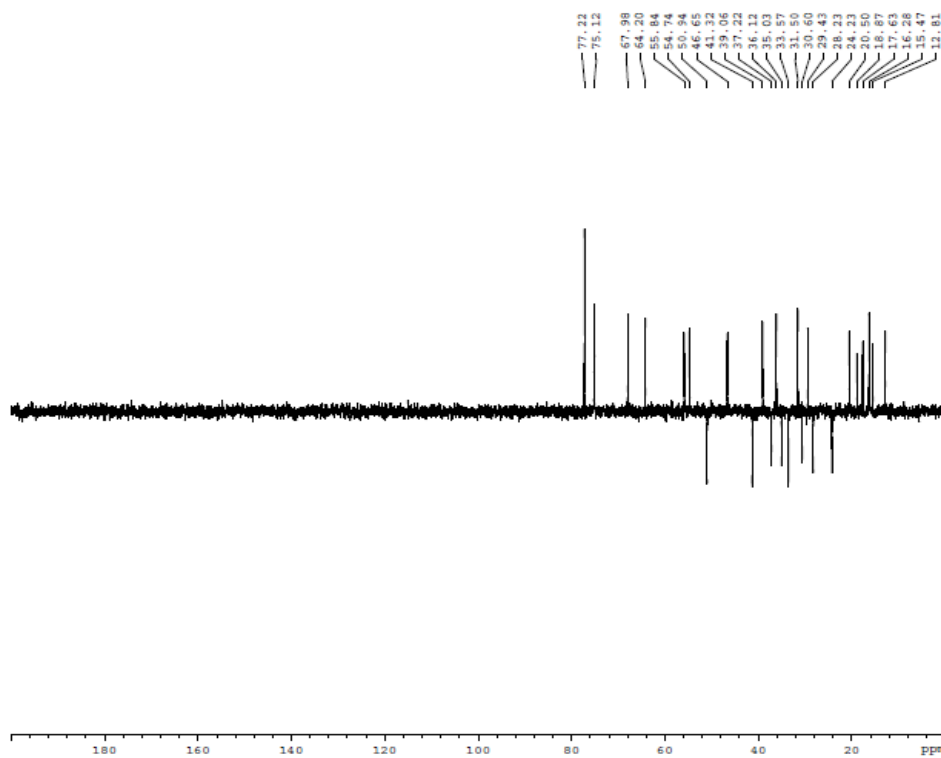



Figure S21. HSQC spectrum of the new compound 3.

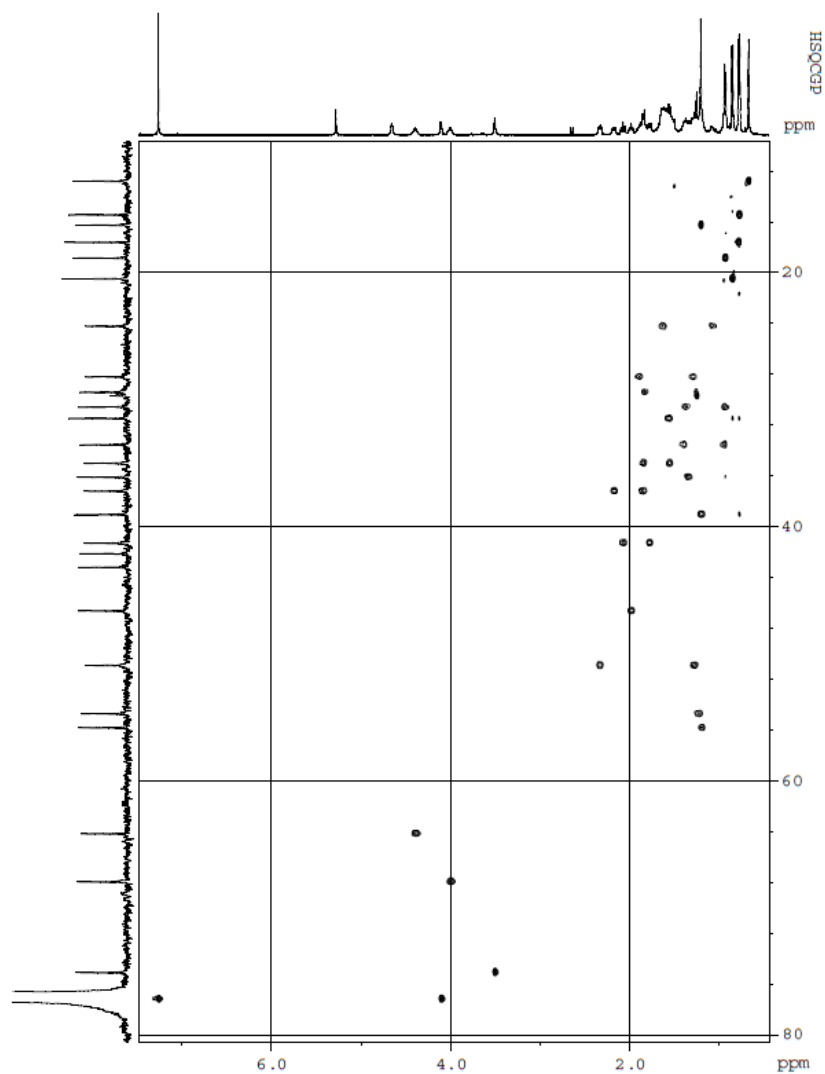

Figure S22.  $^1\text{H}$ - $^1\text{H}$  COSY spectrum of the new compound 3.

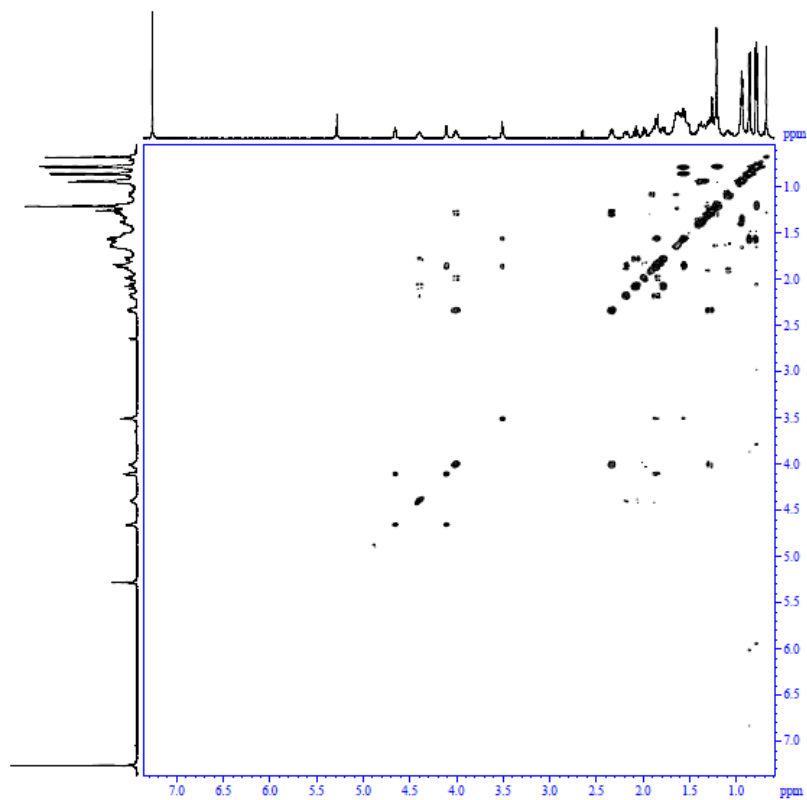

Figure S23. HMBC spectrum of the new compound 3.

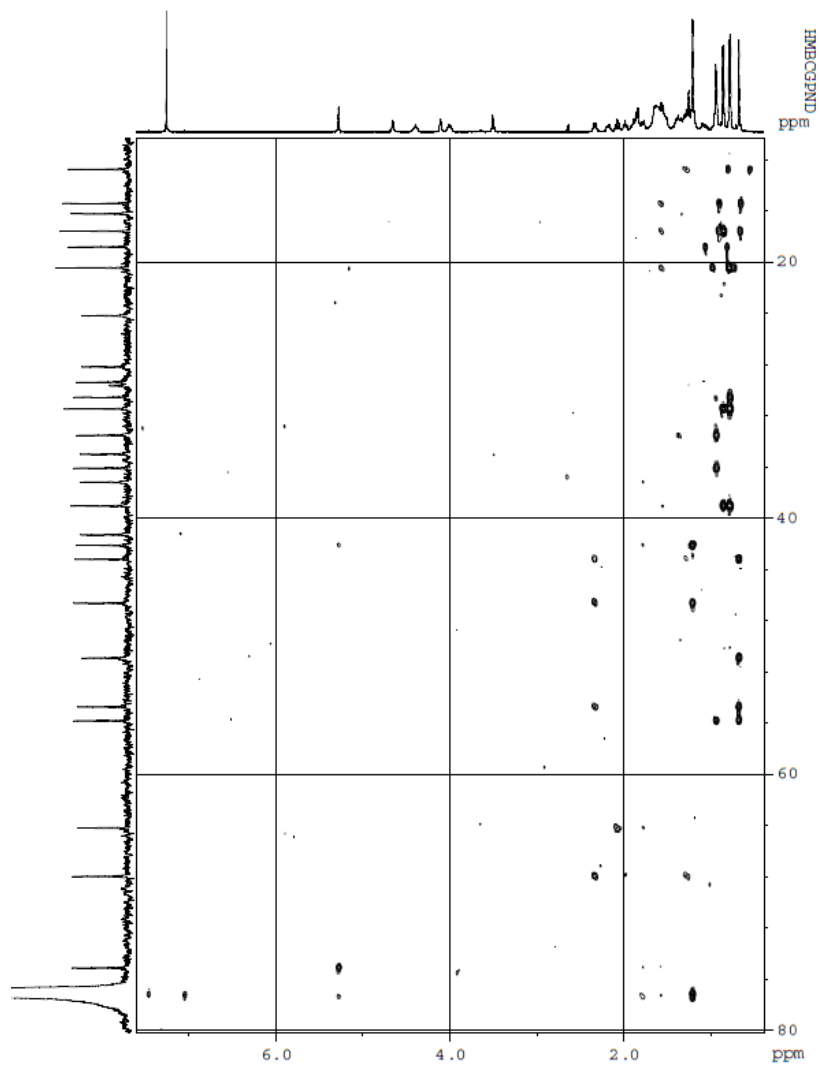

Figure S24. NOESY spectrum of the new compound 3.

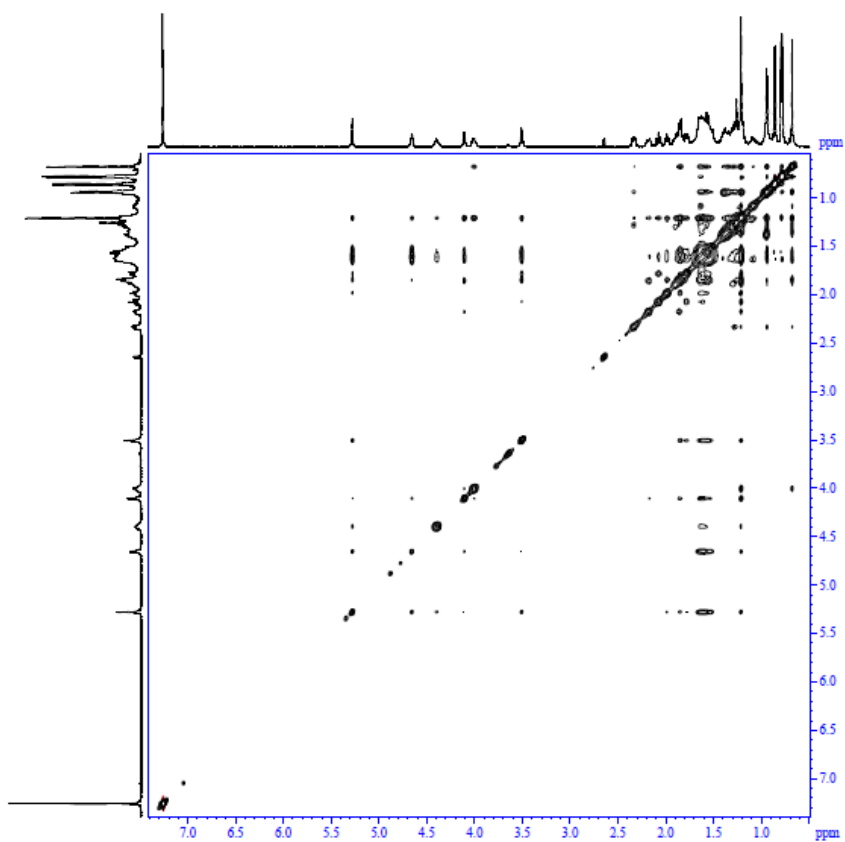



**Figure S27.**  $^{13}\text{C}$  MNR (100 MHz,  $\text{CDCl}_3$ ) spectrum of the new compound **4**.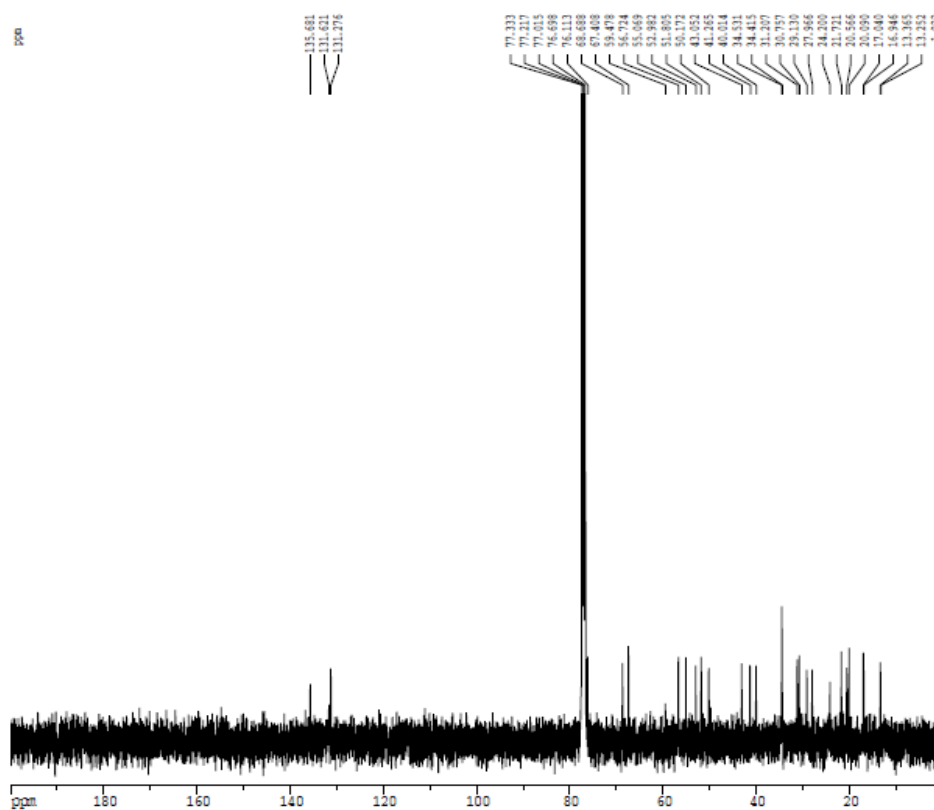**Figure S28.** DEPT (100 MHz,  $\text{CDCl}_3$ ) spectrum of the new compound **4**.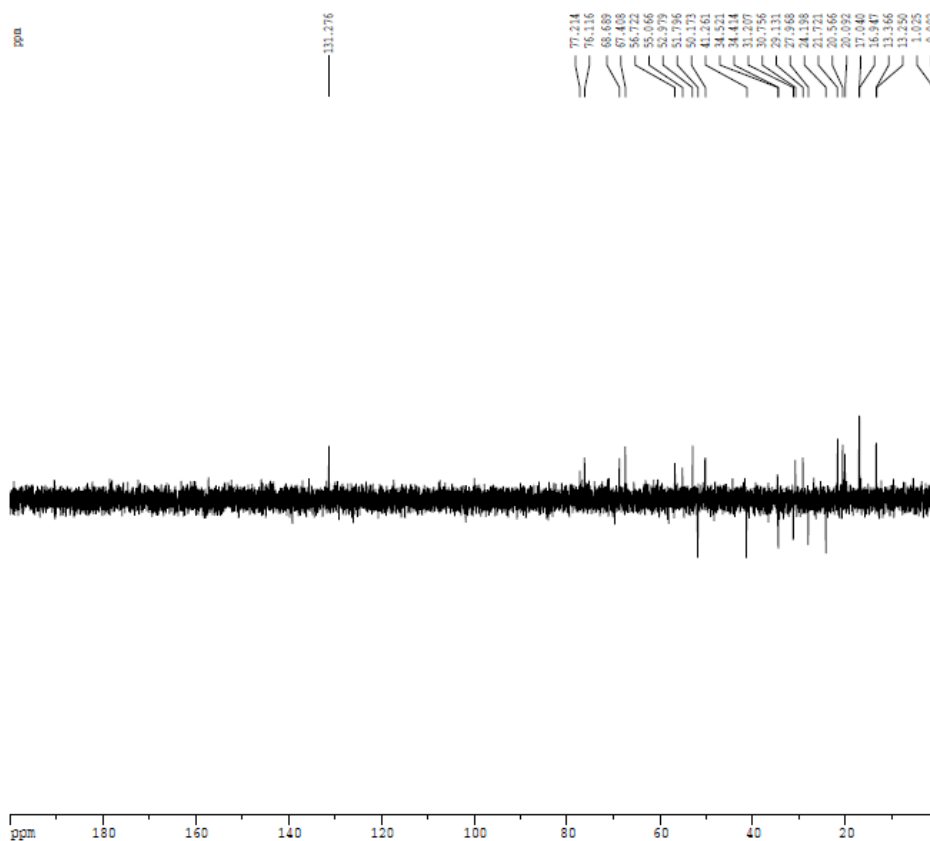

Figure S29. HSQC spectrum of the new compound 4.

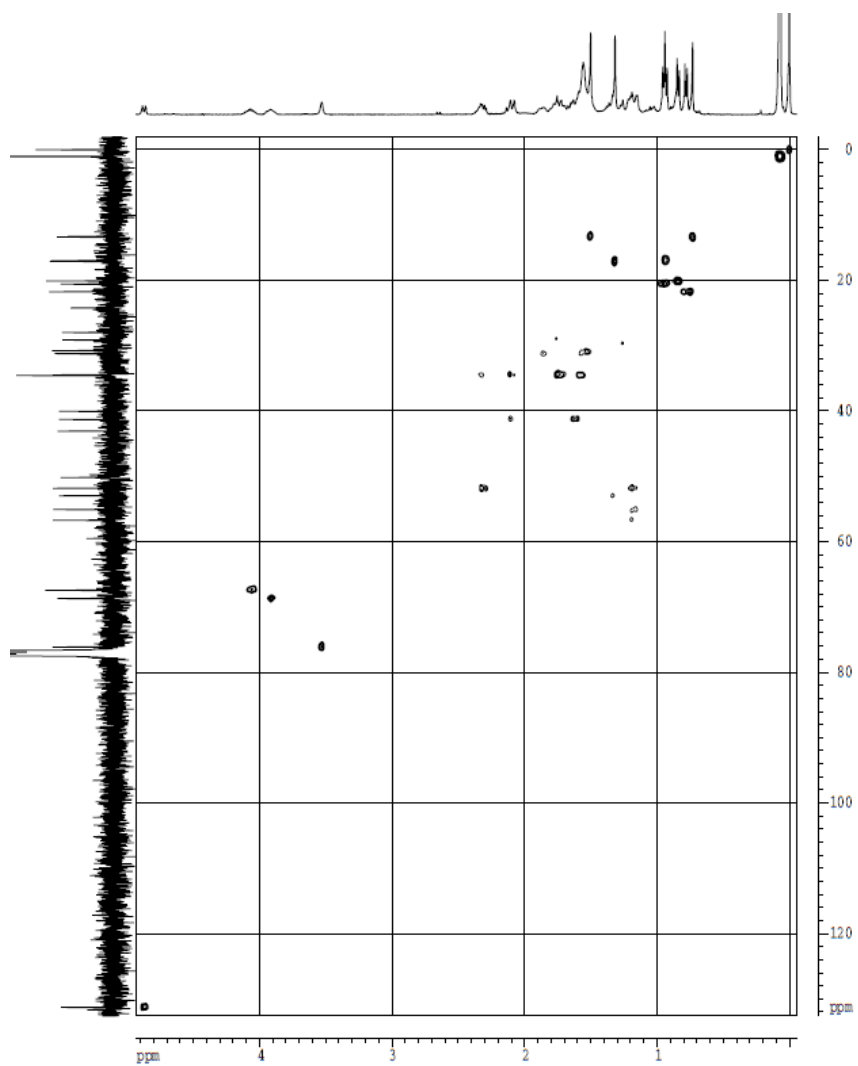

Figure S30.  $^1\text{H}$ - $^1\text{H}$  COSY spectrum of the new compound 4.

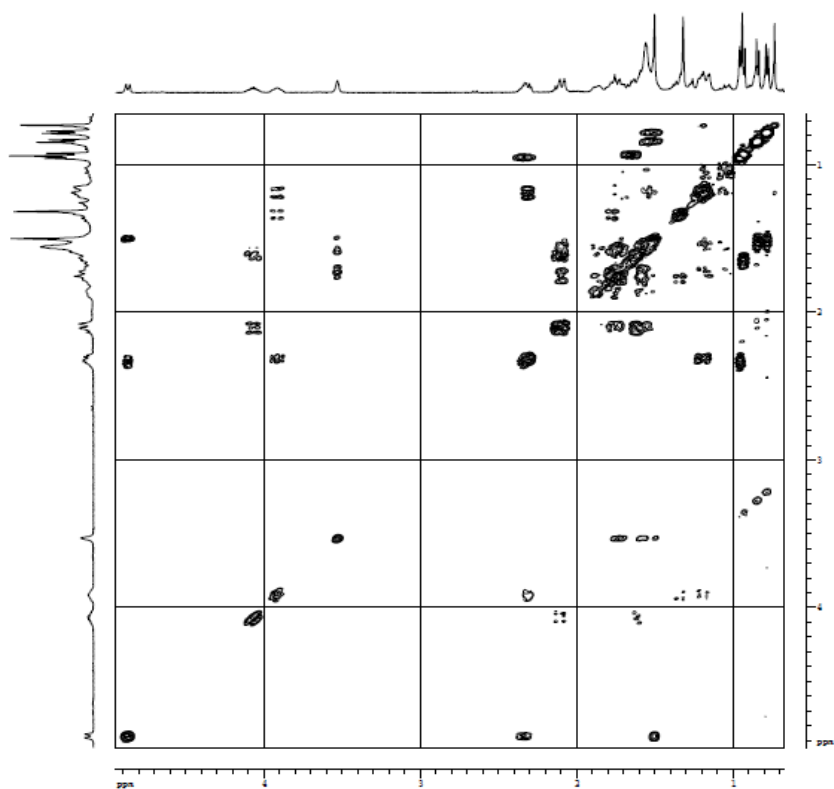



Figure S31. HMBC spectrum of the new compound 4.

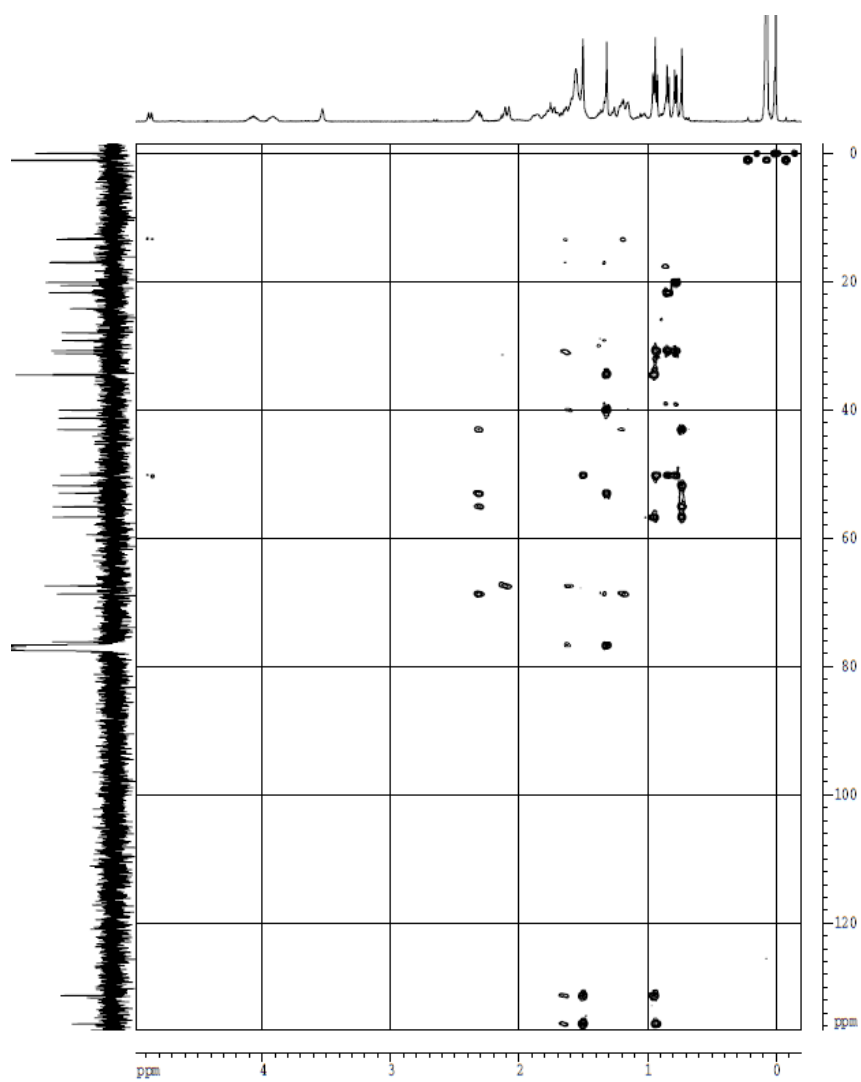

Figure S32. NOESY spectrum of the new compound 4.

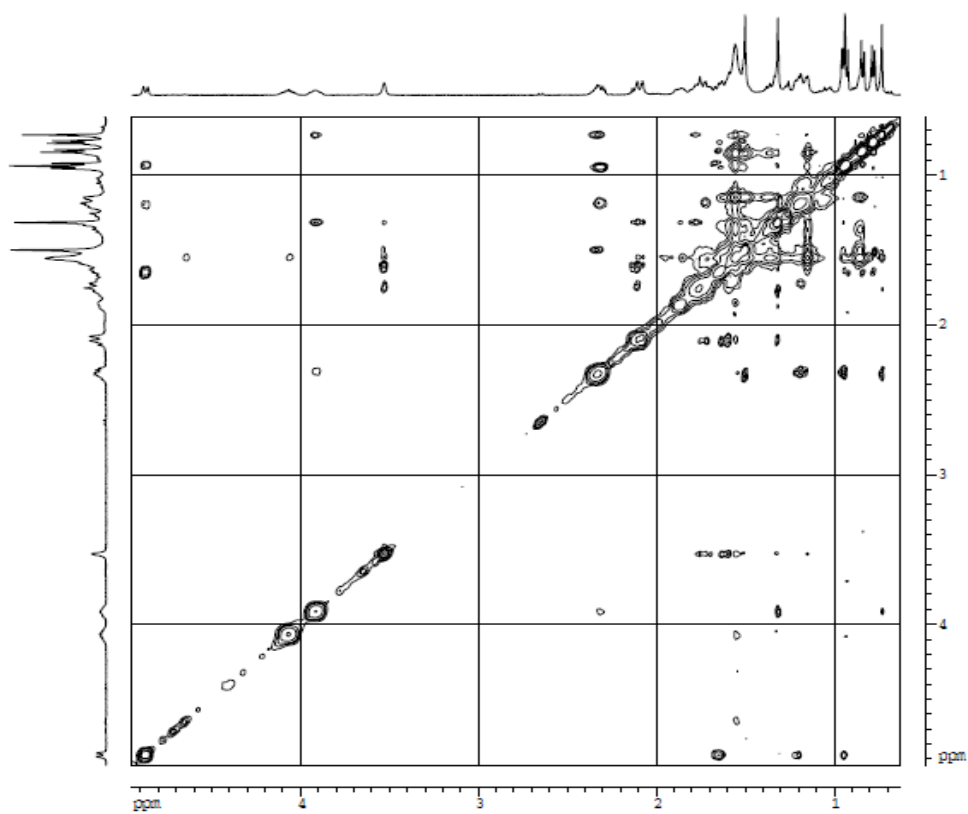

Figure S33. HR-ESIMS spectrum of the new compound 5.

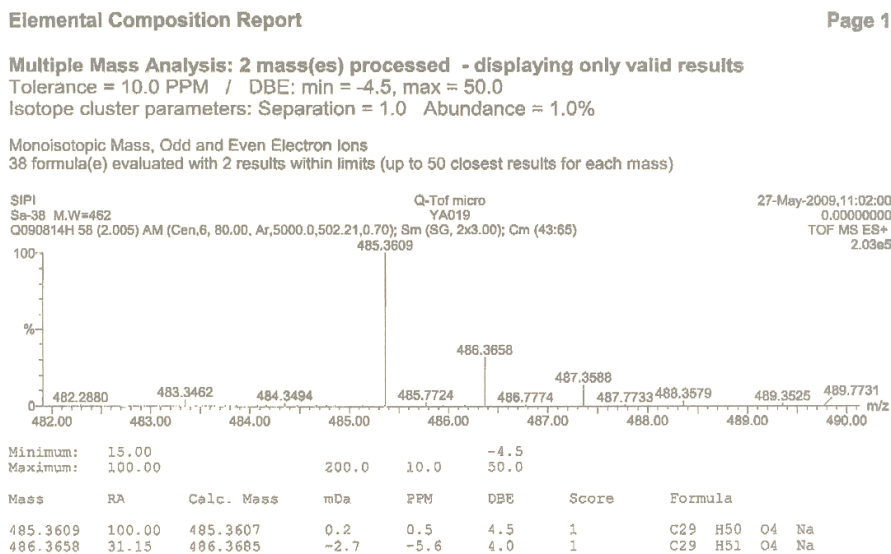

Figure S34. <sup>1</sup>H MNR (400 MHz, CDCl<sub>3</sub>) spectrum of the new compound 5.

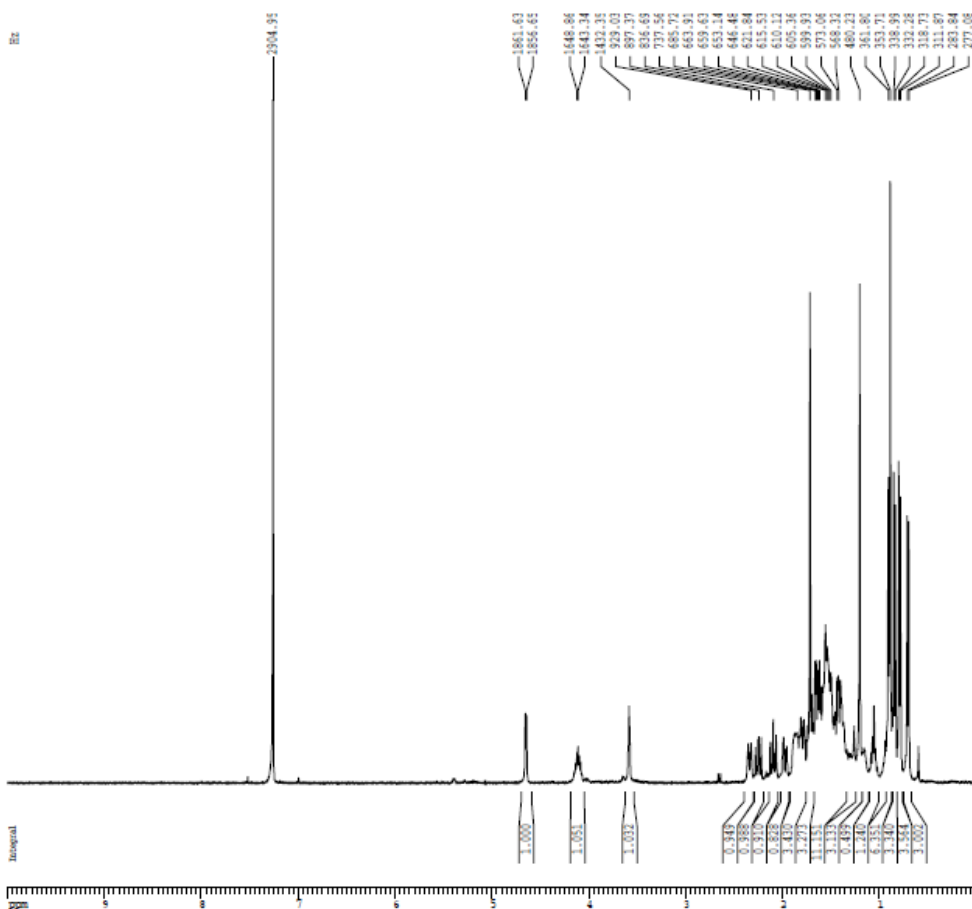

**Figure S35.**  $^{13}\text{C}$  MNR (100 MHz,  $\text{CDCl}_3$ ) spectrum of the new compound **5**.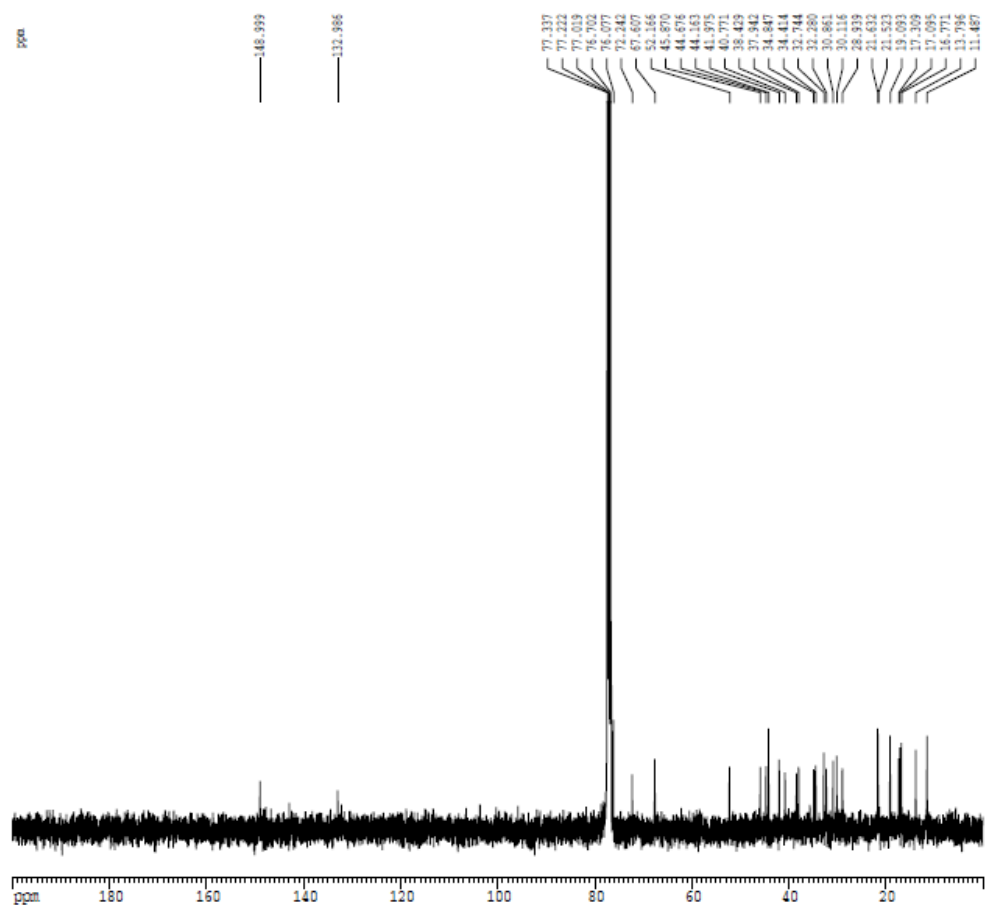**Figure S36.** DEPT (100 MHz,  $\text{CDCl}_3$ ) spectrum (1) of the new compound **5**.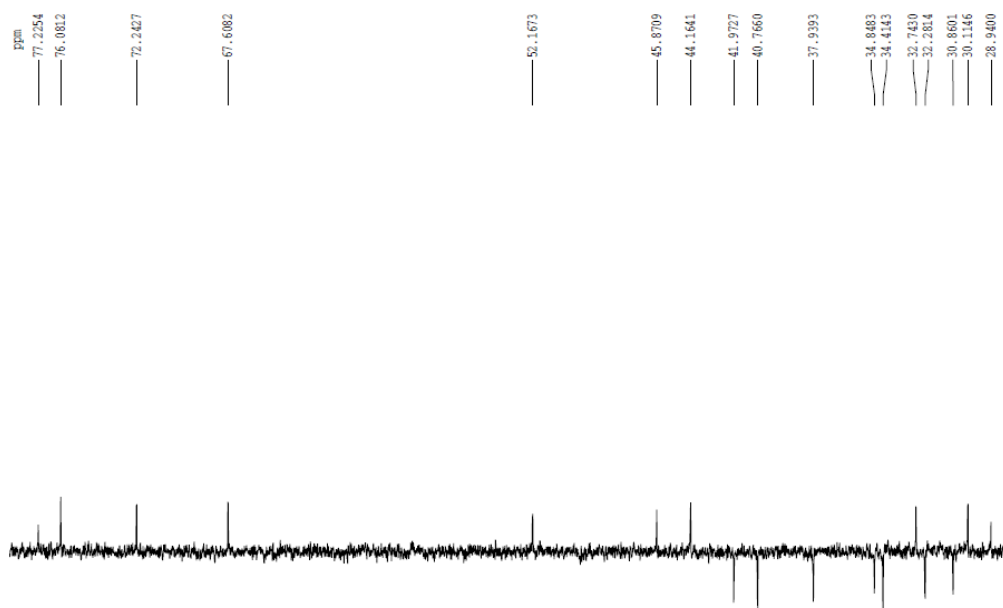

**Figure S37.** DEPT (100 MHz, CDCl<sub>3</sub>) spectrum (2) of the new compound **5**.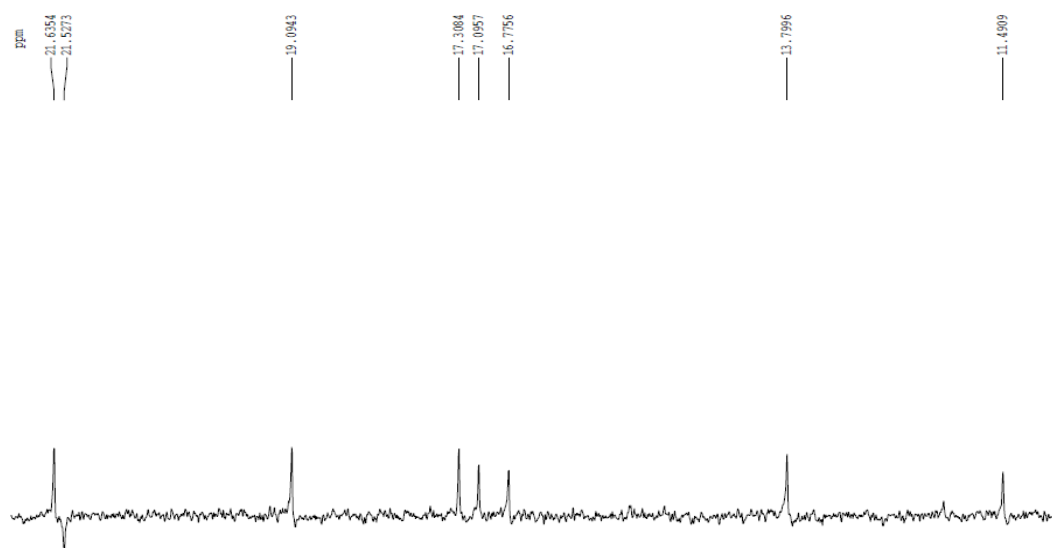**Figure S38.** <sup>1</sup>H-<sup>1</sup>H COSY spectrum of the new compound **5**.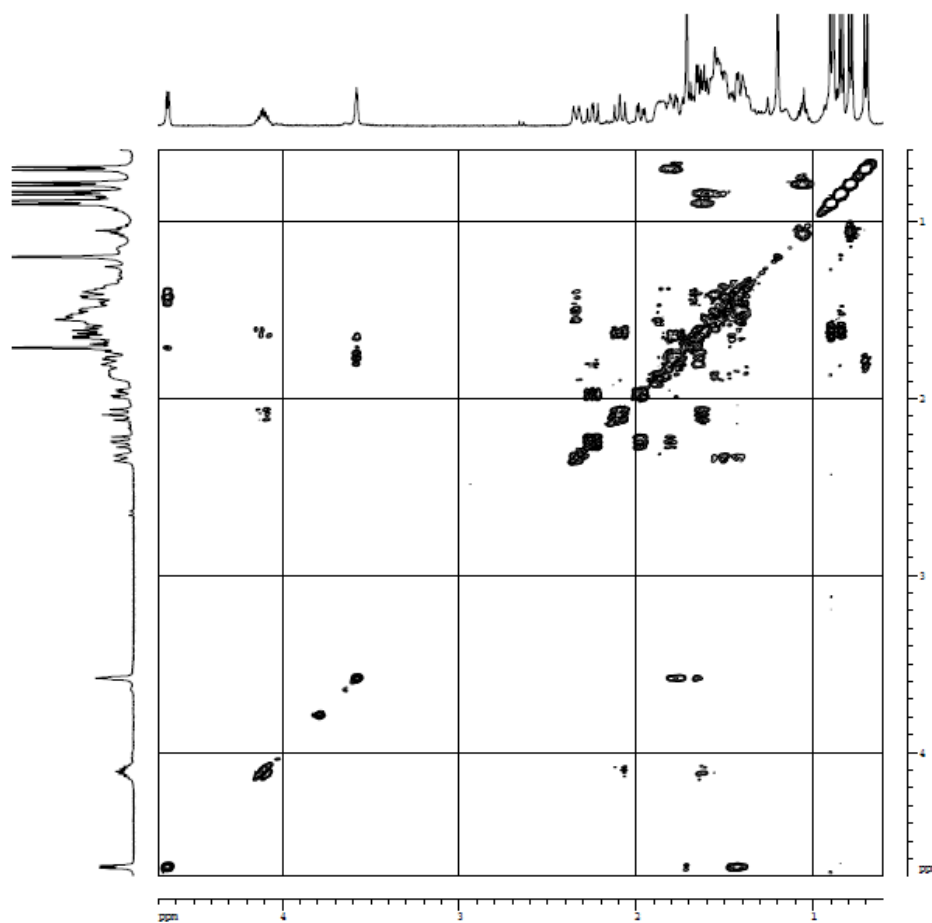

Figure S39. HSQC spectrum of the new compound 5.

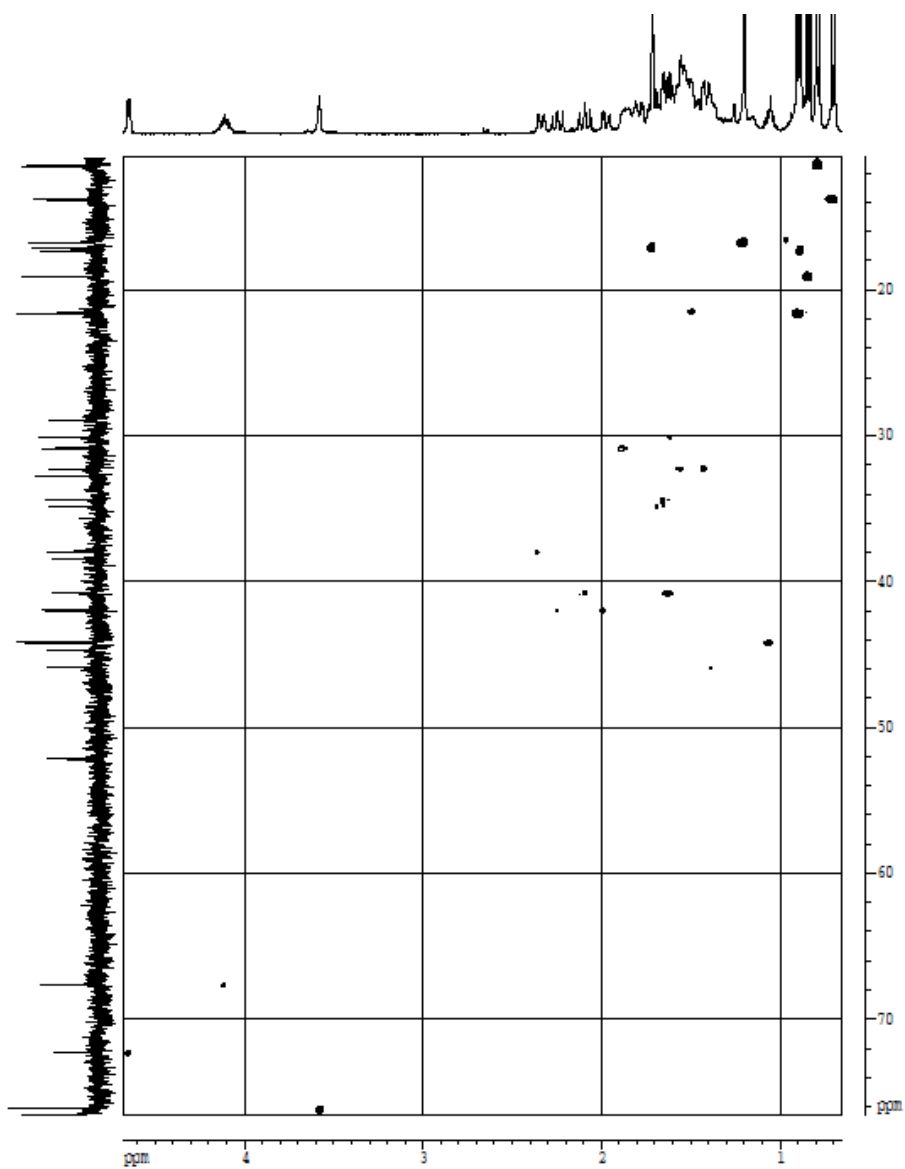

Figure S40. HMBC spectrum of the new compound 5.

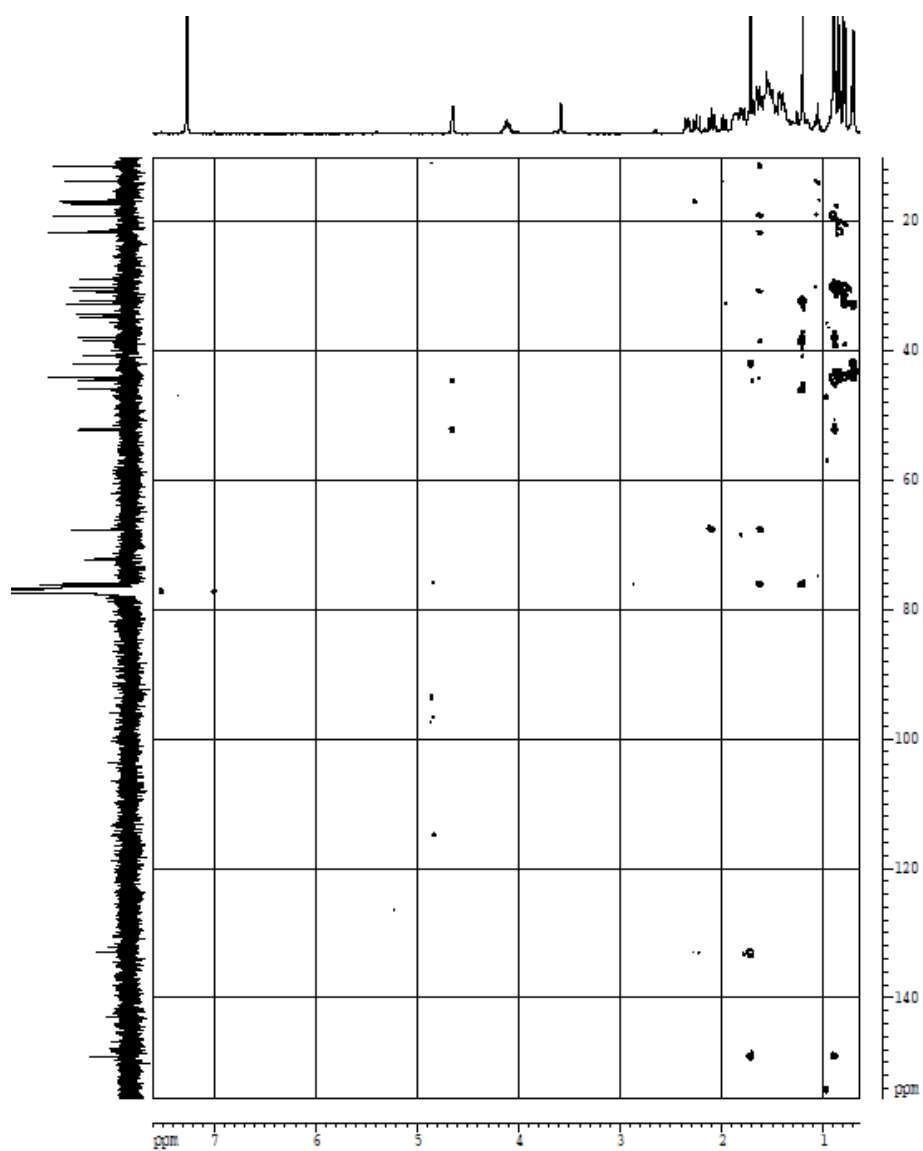

Figure S41. NOESY spectrum of the new compound 5.

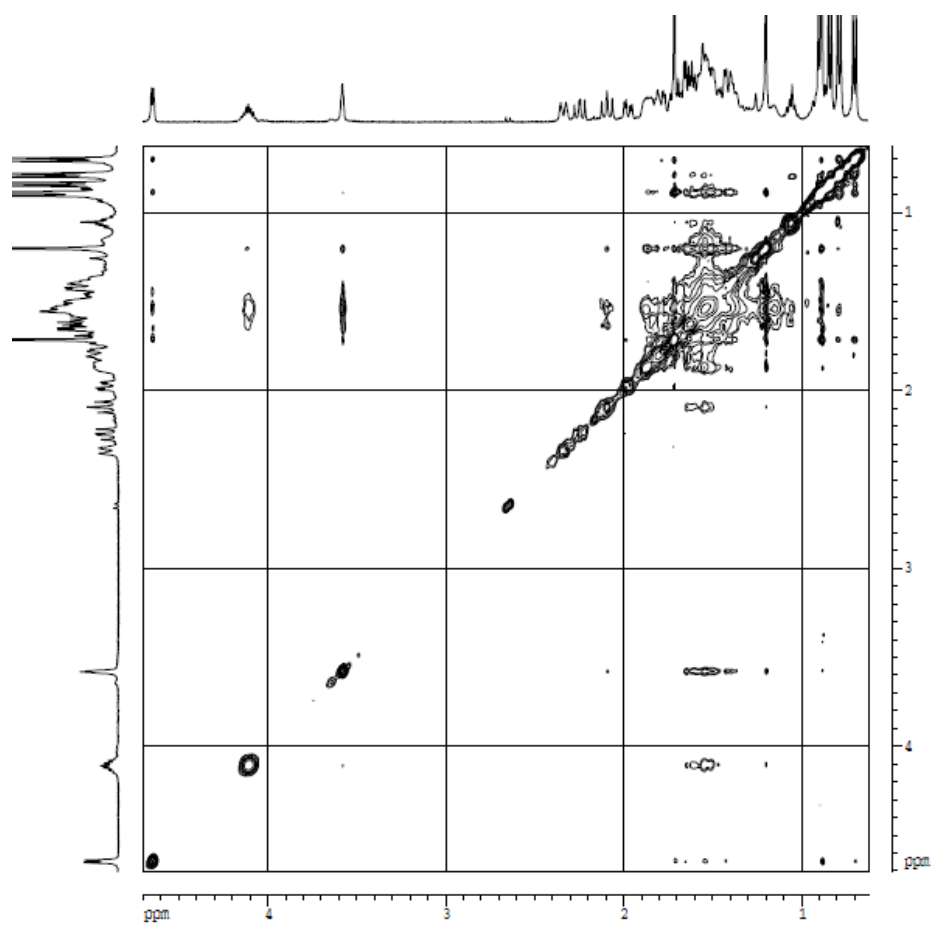





**Figure S44.**  $^{13}\text{C}$  MNR (100 MHz,  $\text{CDCl}_3$ ) spectrum of the new compound **6**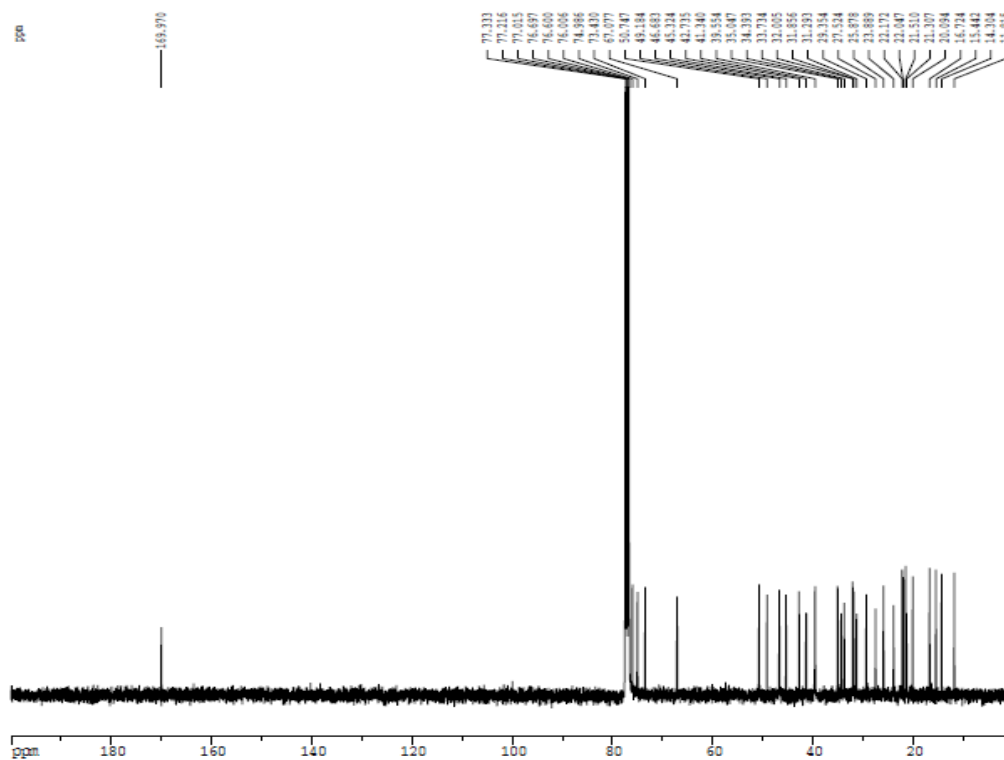**Figure S45.** DEPT (100 MHz,  $\text{CDCl}_3$ ) spectrum of the new compound **6**.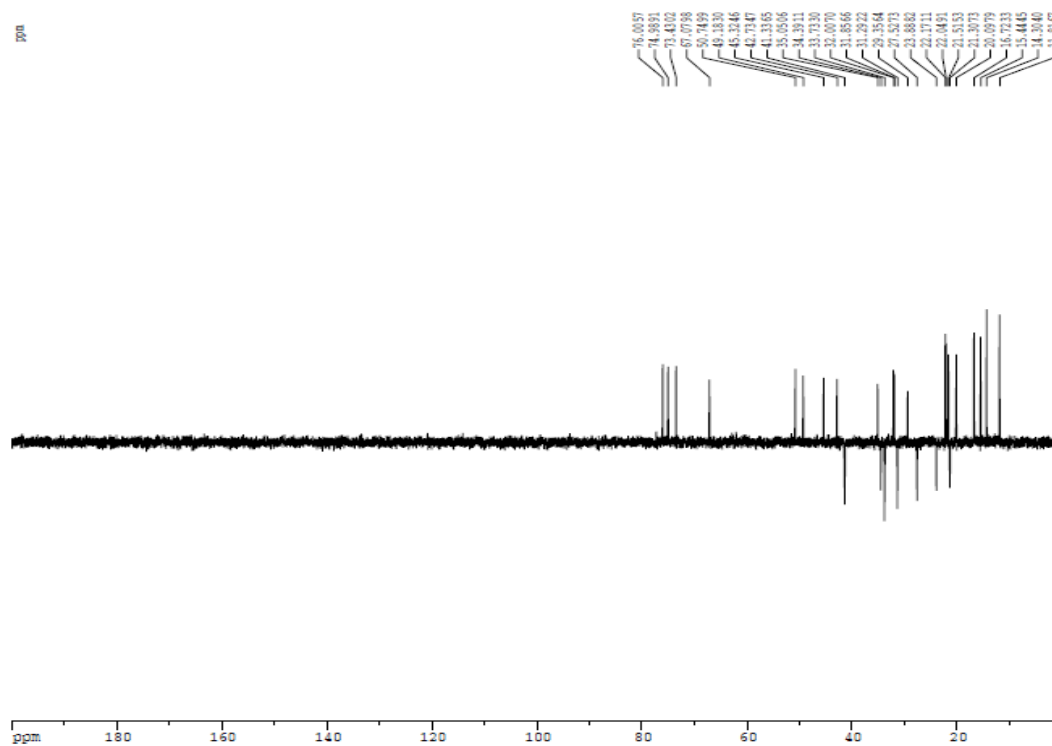

Figure S46. HSQC spectrum of the new compound 6.

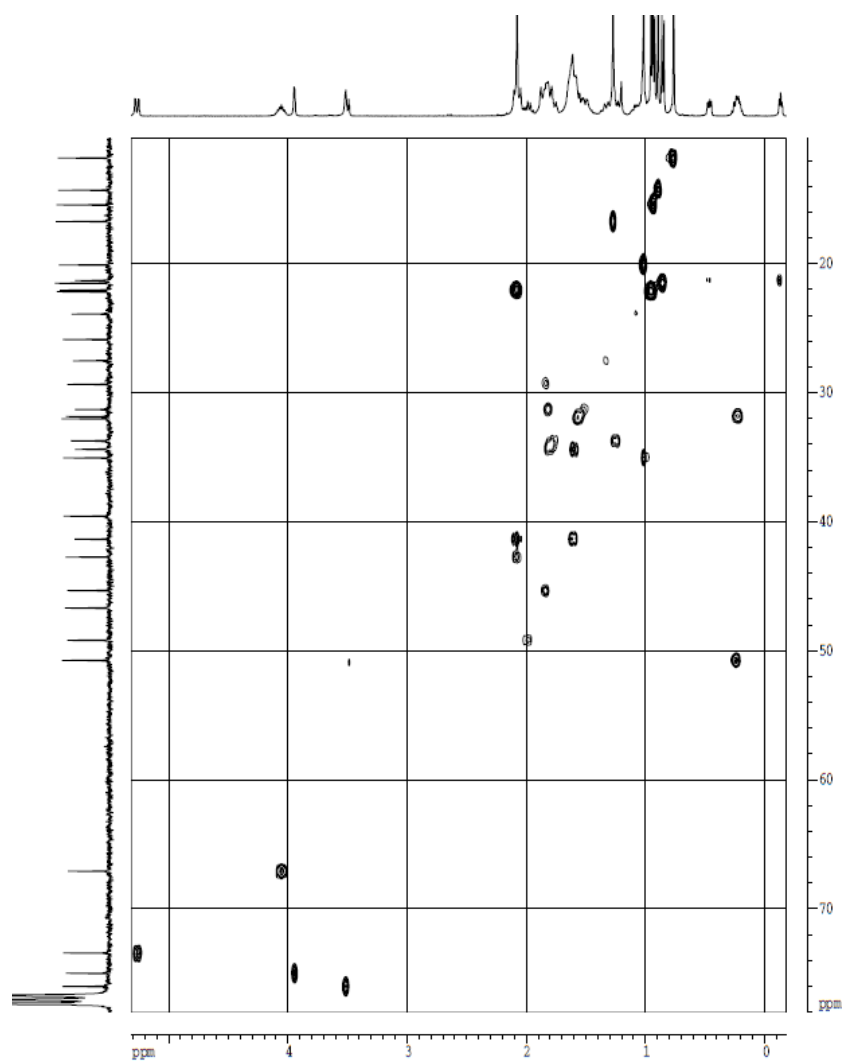

Figure S47.  $^1\text{H}$ - $^1\text{H}$  COSY spectrum of the new compound 6.

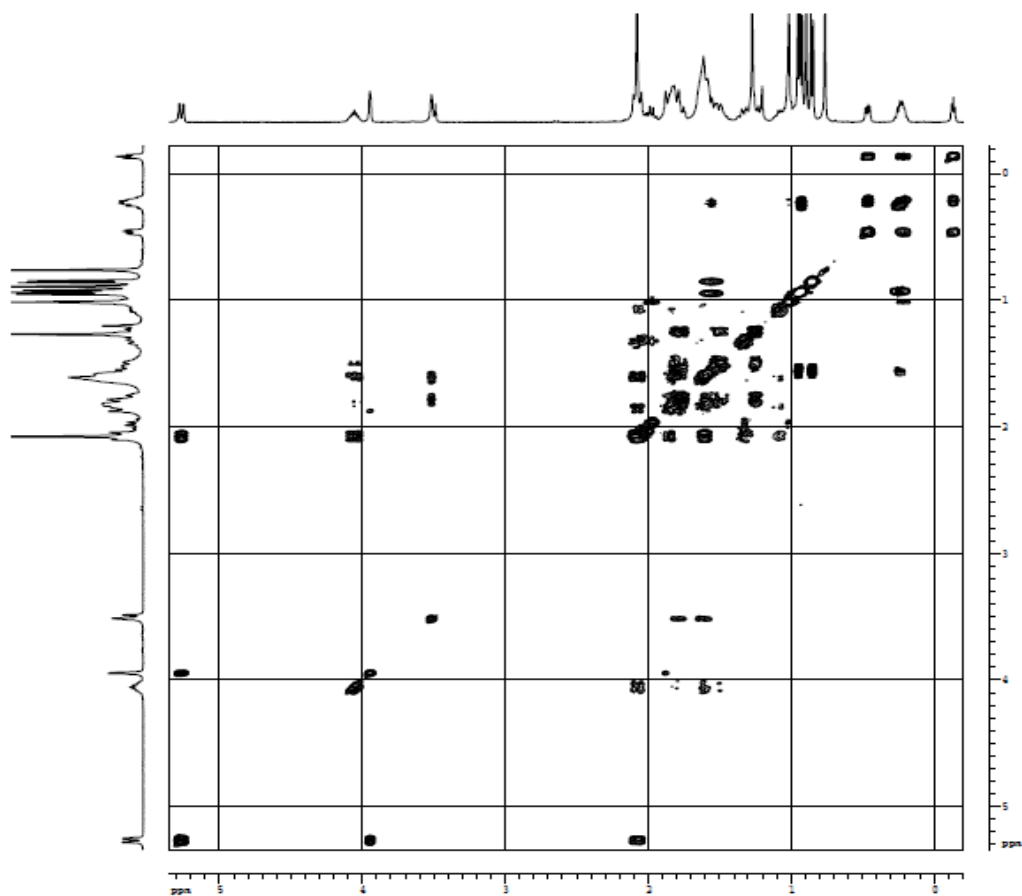

Figure S48. HMBC spectrum of the new compound 6.

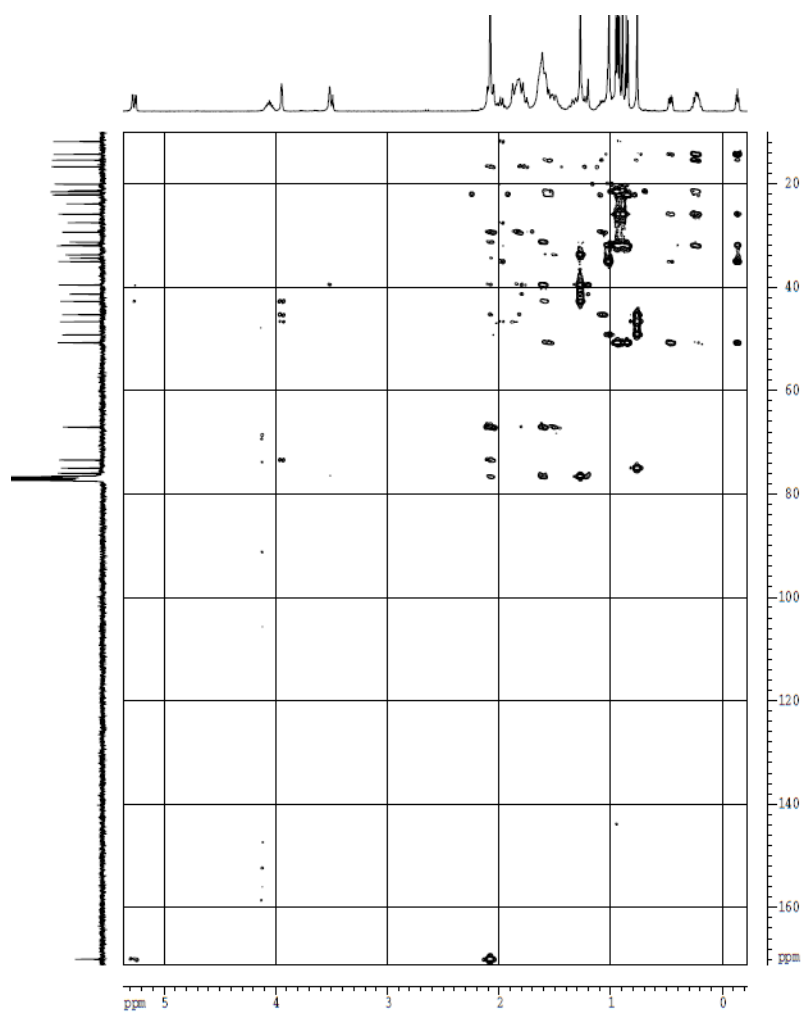

Figure S49. NOESY spectrum of the new compound 6.

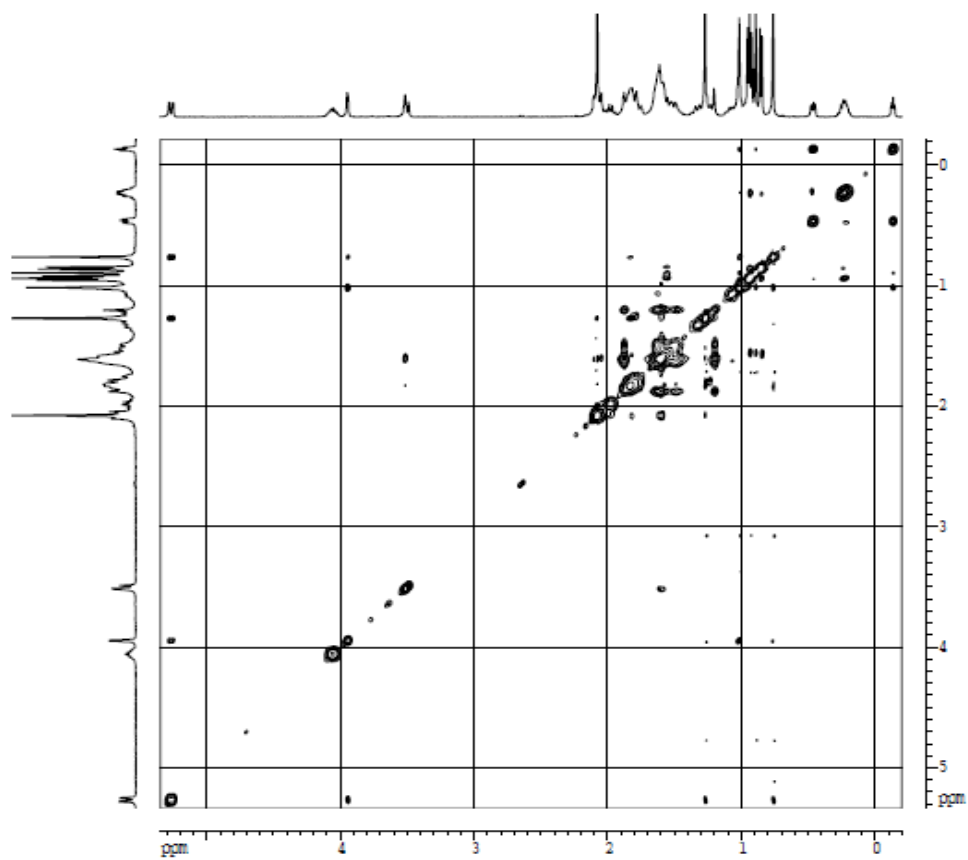

Figure S50. HR-ESIMS spectrum of the new compound 7.

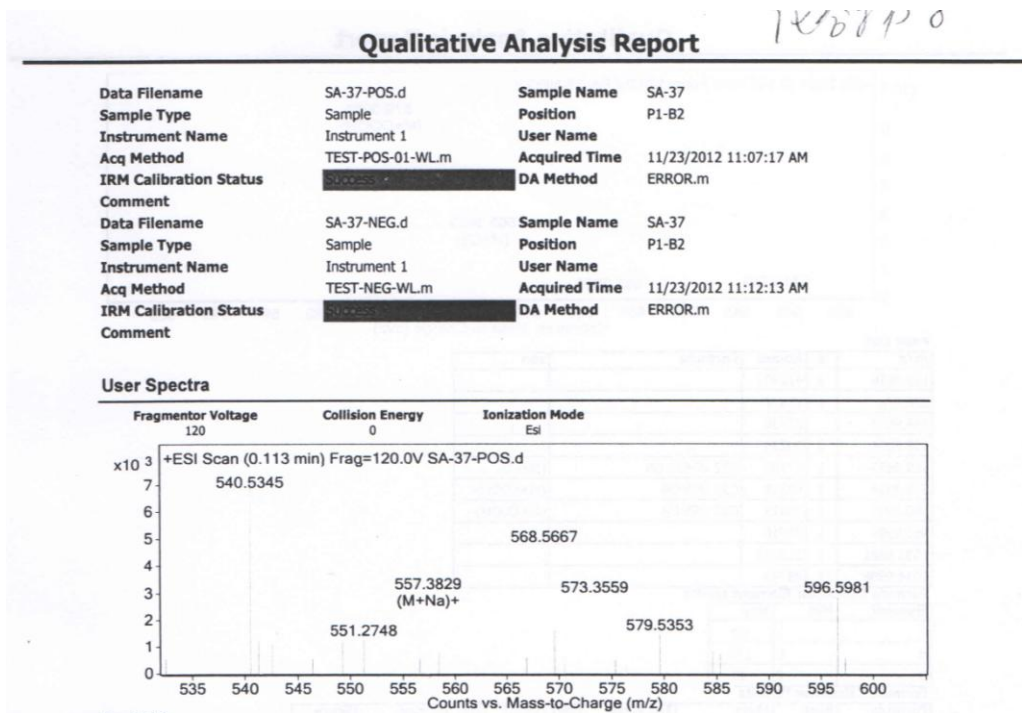

Figure S51. <sup>1</sup>H MNR (500 MHz, CDCl<sub>3</sub>) spectrum of the new compound 7.

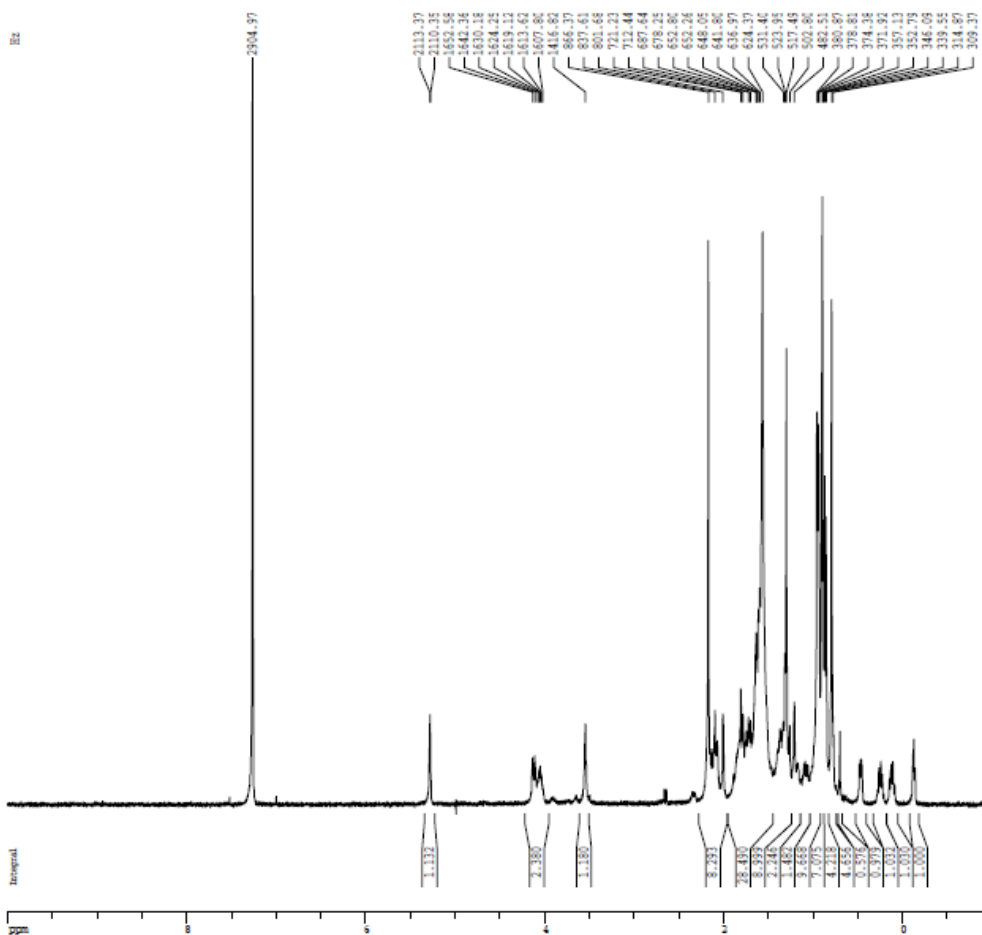

**Figure S52.**  $^{13}\text{C}$  MNR (100 MHz,  $\text{CDCl}_3$ ) spectrum of the new compound 7.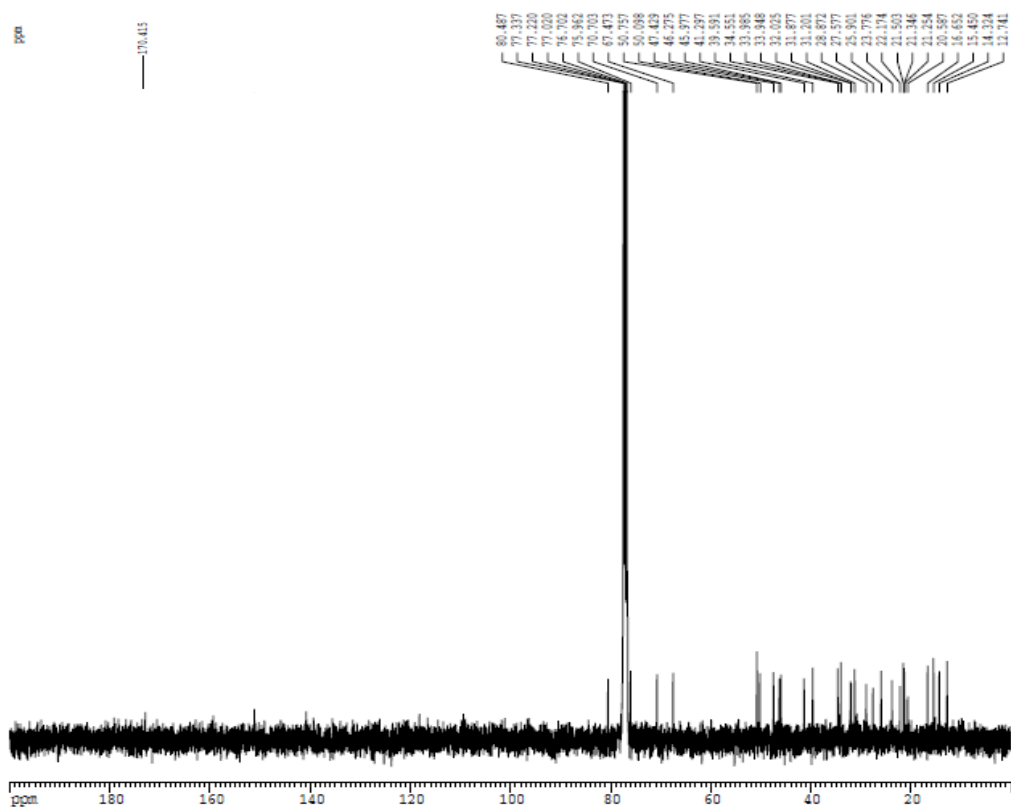**Figure S53.** DEPT (100 MHz,  $\text{CDCl}_3$ ) spectrum of the new compound 7.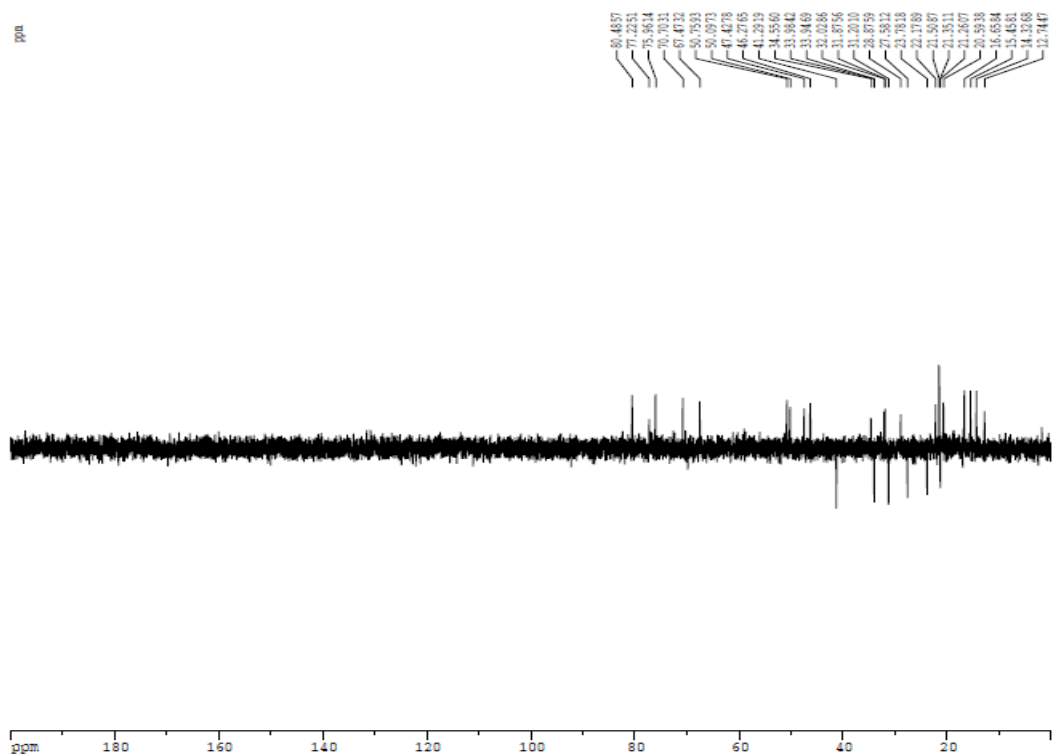



Figure S54. HSQC spectrum of the new compound 7.

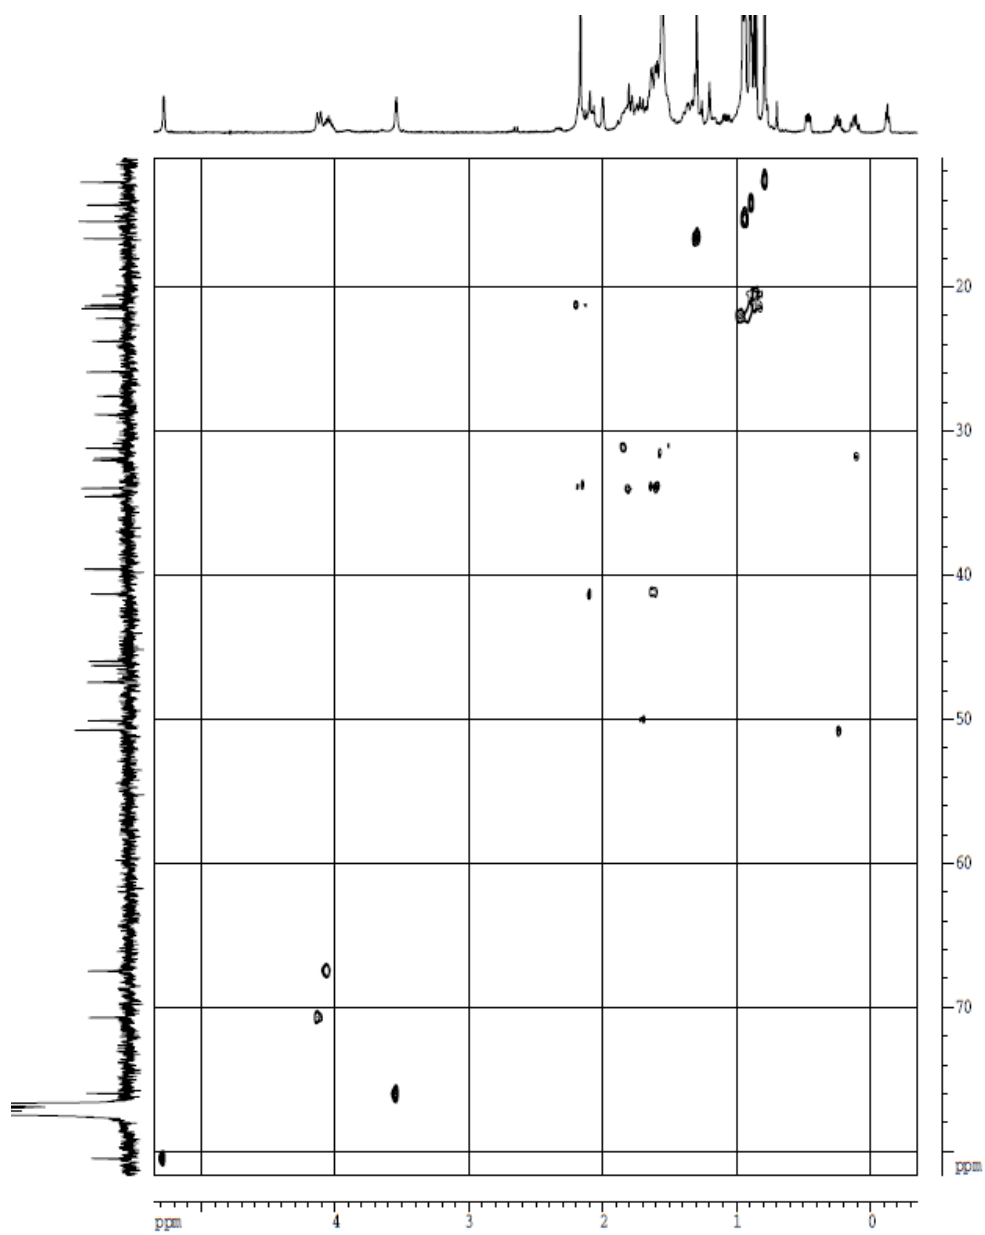

Figure S55.  $^1\text{H}$ - $^1\text{H}$  COSY spectrum of the new compound 7.

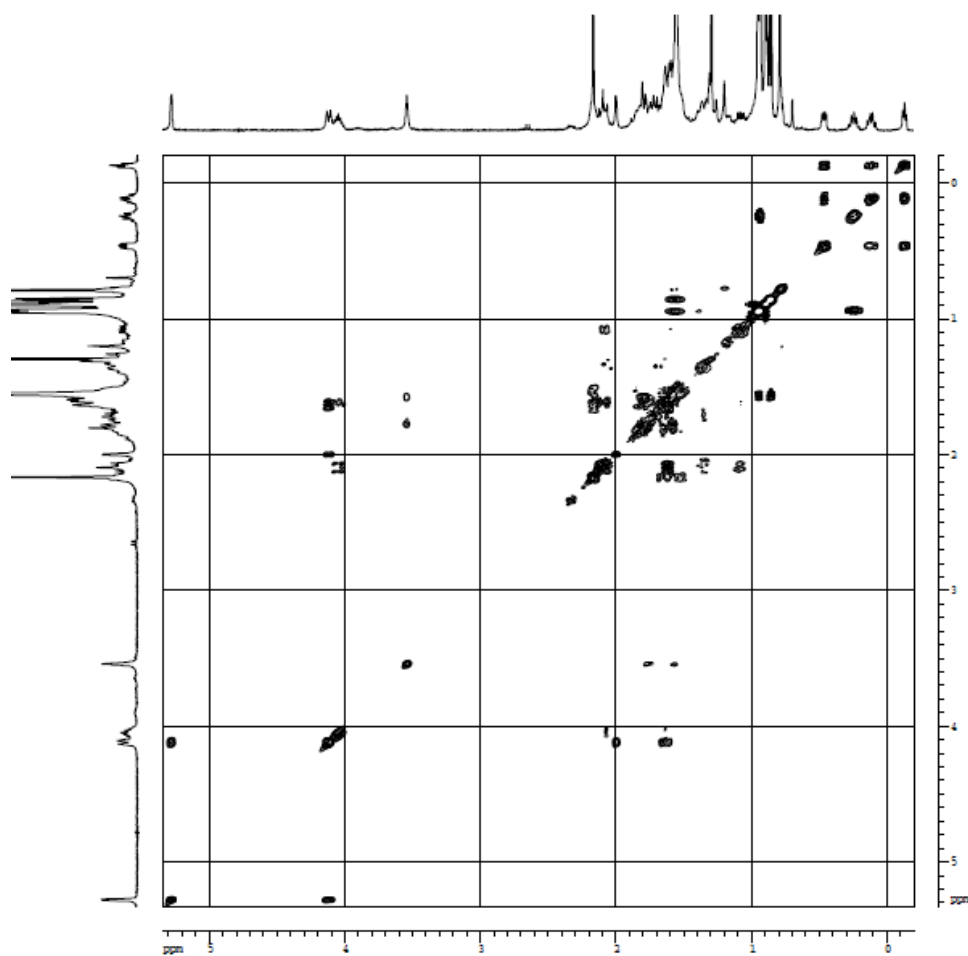

Figure S56. HMBC spectrum of the new compound 7.

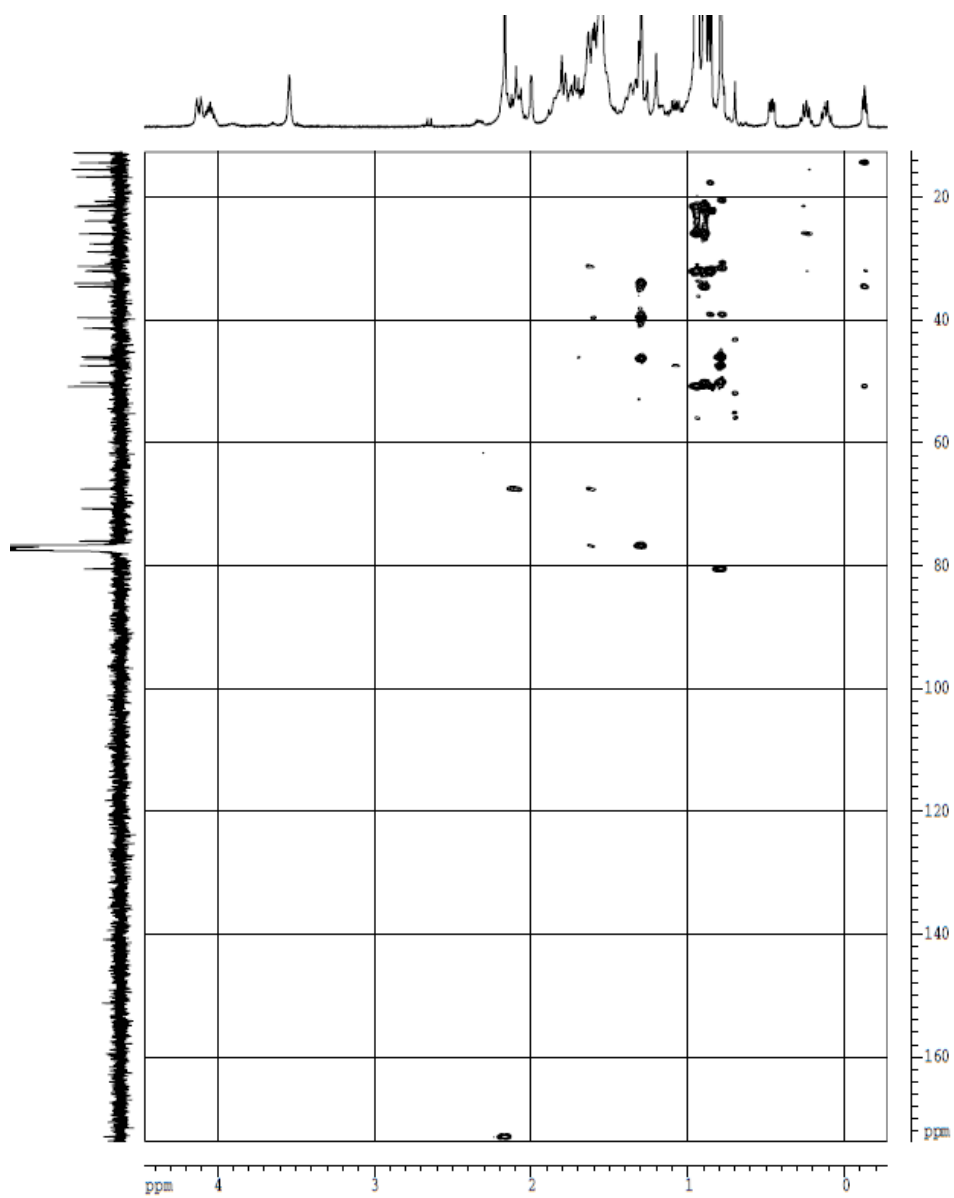

Figure S57. NOESY spectrum of the new compound 7.

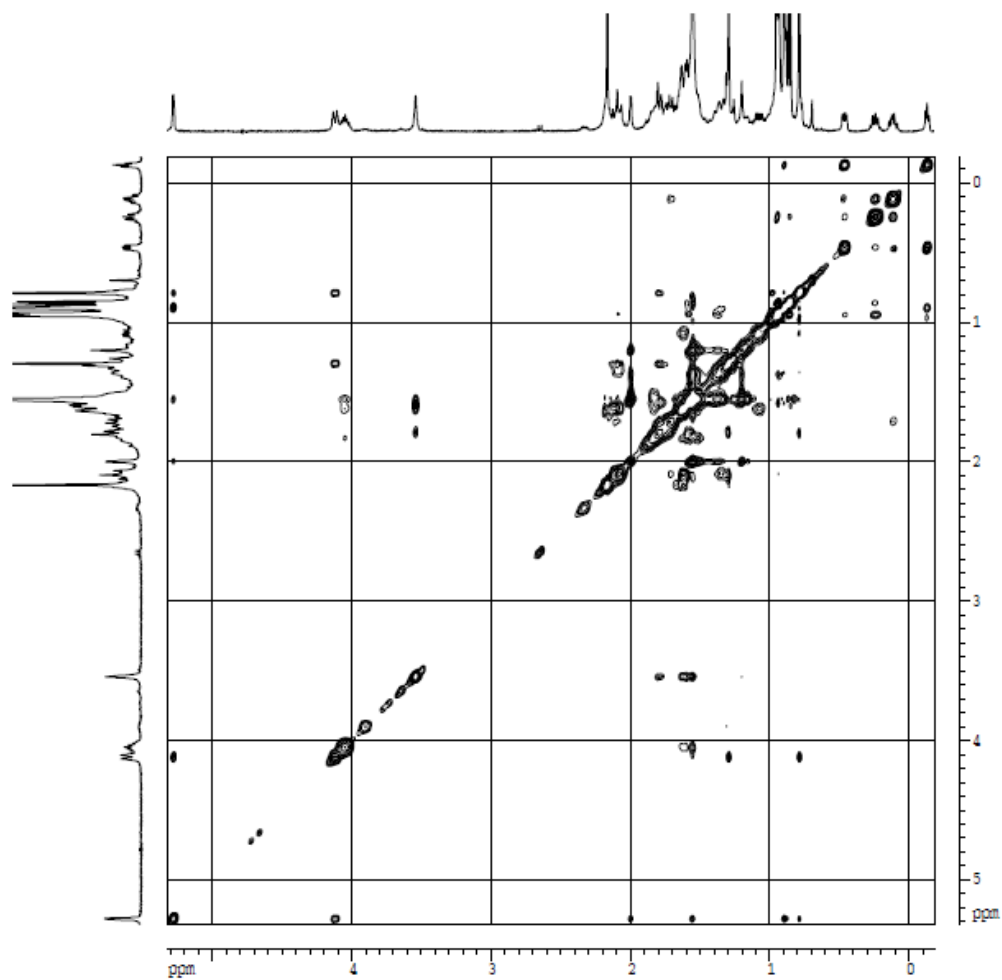

Supplement: marinedrugs-11-00775-s001.pdf [file marinedrugs-11-00775-s001.pdf]
