# Supplementary material for: Bioactive Polyoxygenated Steroids from the South China Sea Soft Coral, Sarcophyton sp
Source: MDPI journal article supplement (doi:10.3390/md11030775), 2013-03-11
Supplement: s4 [file s4]

marinedrugs-11-00775-s002.mol
  corina  04161404283D 1   1.00000     0.00000 
CORINA 3.49 0023  12.04.2013
 40 43  0  0  0  0  0  0  0  0999 V2000
    0.1644    2.1651   -0.1372 C   0  0  0  0  0  0  0  0  0  0  0  0
   -0.1461    0.6823   -0.3518 C   0  0  0  0  0  0  0  0  0  0  0  0
    0.3362   -0.1193    0.8590 C   0  0  0  0  0  0  0  0  0  0  0  0
    1.8456    0.0665    1.0247 C   0  0  0  0  0  0  0  0  0  0  0  0
    2.1577    1.5491    1.2388 C   0  0  0  0  0  0  0  0  0  0  0  0
    1.6737    2.3514    0.0290 C   0  0  0  0  0  0  0  0  0  0  0  0
    2.3297   -0.7379    2.2325 C   0  0  0  0  0  0  0  0  0  0  0  0
    3.8393   -0.5514    2.3991 C   0  0  0  0  0  0  0  0  0  0  0  0
    4.1475    0.9302    2.6196 C   0  0  0  0  0  0  0  0  0  0  0  0
    3.6673    1.7323    1.4002 C   0  0  0  0  0  0  0  0  0  0  0  0
    5.6446    1.1460    2.7380 C   0  0  0  0  0  0  0  0  0  0  0  0
    5.8630    2.6523    3.0453 C   0  0  0  0  0  0  0  0  0  0  0  0
    5.5032    3.4279    1.7933 C   0  0  0  0  0  0  0  0  0  0  0  0
    4.0017    3.2137    1.5376 C   0  0  0  0  0  0  0  0  0  0  0  0
    6.3232    0.4827    3.9413 C   0  0  0  0  0  0  0  0  0  0  0  0
    7.6130    1.3288    4.1229 C   0  0  0  0  0  0  0  0  0  0  0  0
    7.3211    2.7116    3.4885 C   0  0  0  0  0  0  0  0  0  0  0  0
    7.5159    3.8214    4.5235 C   0  0  0  0  0  0  0  0  0  0  0  0
    8.9468    3.8218    4.9963 C   0  0  0  0  0  0  0  0  0  0  0  0
    9.2179    3.6307    6.2636 C   0  0  0  0  0  0  0  0  0  0  0  0
   10.0362    4.7158    9.0302 C   0  0  0  0  0  0  0  0  0  0  0  0
   10.8407    4.7242    7.7559 C   0  0  0  0  0  0  0  0  0  0  0  0
   10.6488    3.6311    6.7365 C   0  0  0  0  0  0  0  0  0  0  0  0
   11.7068    5.6817    7.5344 C   0  0  0  0  0  0  0  0  0  0  0  0
    7.1883    5.1743    3.8884 C   0  0  0  0  0  0  0  0  0  0  0  0
    7.9706    2.8775    2.6290 H   0  0  0  0  0  0  0  0  0  0  0  0
    4.9543    3.0820    4.1988 C   0  0  0  0  0  0  0  0  0  0  0  0
    3.6378    1.2827    3.5163 H   0  0  0  0  0  0  0  0  0  0  0  0
    6.1419    0.8706    1.8080 H   0  0  0  0  0  0  0  0  0  0  0  0
    4.1656    1.3508    0.5090 H   0  0  0  0  0  0  0  0  0  0  0  0
    2.5137   -0.3954   -0.1511 O   0  0  0  0  0  0  0  0  0  0  0  0
    1.6605   -0.2796    3.4090 O   0  0  0  0  0  0  0  0  0  0  0  0
    1.4441    2.0443    2.4984 C   0  0  0  0  0  0  0  0  0  0  0  0
   -1.5559    0.5083   -0.5074 O   0  0  0  0  0  0  0  0  0  0  0  0
    8.4160    3.4728    6.9696 H   0  0  0  0  0  0  0  0  0  0  0  0
   10.9764    2.2782    7.3716 C   0  0  0  0  0  0  0  0  0  0  0  0
    3.6252    3.9011    0.3153 O   0  0  0  0  0  0  0  0  0  0  0  0
    3.1797    5.6985    1.5213 O   0  0  0  0  0  0  0  0  0  0  0  0
    3.2191    5.1751    0.4330 C   0  0  0  0  0  0  0  0  0  0  0  0
    2.8125    5.9526   -0.7922 C   0  0  0  0  0  0  0  0  0  0  0  0
  1  2  1  0      
  2  3  1  0      
  3  4  1  0      
  4  5  1  0      
  5  6  1  0      
  6  1  1  0      
  4  7  1  0      
  7  8  1  0      
  8  9  1  0      
  9 10  1  0      
 10  5  1  0      
  9 11  1  0      
 11 12  1  0      
 12 13  1  0      
 13 14  1  0      
 14 10  1  0      
 11 15  1  0      
 15 16  1  0      
 16 17  1  0      
 17 12  1  0      
 17 18  1  0      
 18 19  1  0      
 20 19  2  0      
 21 22  1  0      
 22 23  1  0      
 23 20  1  0      
 22 24  4  0      
 18 25  1  0      
 17 26  1  0      
 12 27  1  0      
  9 28  1  0      
 11 29  1  0      
 10 30  1  0      
  4 31  1  0      
  7 32  1  0      
  5 33  1  0      
  2 34  1  0      
 20 35  1  0      
 23 36  1  0      
 14 37  1  0      
 37 39  1  0      
 38 39  2  0      
 39 40  1  0      
M  STY  1   1 SUP
M  SLB  1   1   1
M  SAL   1  4  37  38  39  40
M  SBL   1  1  40
M  SMT   1 OAc
M  SBV   1 40   -8.1664    5.6888
M  END
$$$$
