# Supplementary material for: Bioactive Polyoxygenated Steroids from the South China Sea Soft Coral, Sarcophyton sp
Source: MDPI journal article supplement (doi:10.3390/md11030775), 2013-03-11
Supplement: s5 [file s5]

marinedrugs-11-00775-s002.mol
  ChemDraw03251423512D

 40 43  0  0  0  0  0  0  0  0999 V2000
   -3.6074   -0.7462    0.0000 C   0  0  0  0  0  0  0  0  0  0  0  0
   -3.6074   -1.5712    0.0000 C   0  0  0  0  0  0  0  0  0  0  0  0
   -2.8930   -1.9837    0.0000 C   0  0  0  0  0  0  0  0  0  0  0  0
   -2.1785   -1.5712    0.0000 C   0  0  0  0  0  0  0  0  0  0  0  0
   -2.1785   -0.7462    0.0000 C   0  0  0  0  0  0  0  0  0  0  0  0
   -2.8930   -0.3337    0.0000 C   0  0  0  0  0  0  0  0  0  0  0  0
   -1.4640   -1.9837    0.0000 C   0  0  0  0  0  0  0  0  0  0  0  0
   -0.7495   -1.5712    0.0000 C   0  0  0  0  0  0  0  0  0  0  0  0
   -0.7495   -0.7462    0.0000 C   0  0  0  0  0  0  0  0  0  0  0  0
   -1.4640   -0.3337    0.0000 C   0  0  0  0  0  0  0  0  0  0  0  0
   -0.0351   -0.3337    0.0000 C   0  0  0  0  0  0  0  0  0  0  0  0
   -0.0351    0.4913    0.0000 C   0  0  0  0  0  0  0  0  0  0  0  0
   -0.7495    0.9038    0.0000 C   0  0  0  0  0  0  0  0  0  0  0  0
   -1.4640    0.4913    0.0000 C   0  0  0  0  0  0  0  0  0  0  0  0
    0.7495   -0.5887    0.0000 C   0  0  0  0  0  0  0  0  0  0  0  0
    1.2345    0.0788    0.0000 C   0  0  0  0  0  0  0  0  0  0  0  0
    0.7495    0.7462    0.0000 C   0  0  0  0  0  0  0  0  0  0  0  0
    0.7495    1.5712    0.0000 C   0  0  0  0  0  0  0  0  0  0  0  0
    1.4640    1.9837    0.0000 C   0  0  0  0  0  0  0  0  0  0  0  0
    2.1785    1.5712    0.0000 C   0  0  0  0  0  0  0  0  0  0  0  0
    3.6074    0.7462    0.0000 C   0  0  0  0  0  0  0  0  0  0  0  0
    3.6074    1.5712    0.0000 C   0  0  0  0  0  0  0  0  0  0  0  0
    2.8930    1.9837    0.0000 C   0  0  0  0  0  0  0  0  0  0  0  0
    4.3219    1.9837    0.0000 C   0  0  0  0  0  0  0  0  0  0  0  0
    0.0351    1.9837    0.0000 C   0  0  0  0  0  0  0  0  0  0  0  0
    1.4640    1.1587    0.0000 H   0  0  0  0  0  0  0  0  0  0  0  0
   -0.0351    1.3163    0.0000 C   0  0  0  0  0  0  0  0  0  0  0  0
   -0.7495    0.0788    0.0000 H   0  0  0  0  0  0  0  0  0  0  0  0
   -0.0351   -1.1587    0.0000 H   0  0  0  0  0  0  0  0  0  0  0  0
   -1.4640   -1.1587    0.0000 H   0  0  0  0  0  0  0  0  0  0  0  0
   -2.1785   -2.3962    0.0000 O   0  0  0  0  0  0  0  0  0  0  0  0
   -1.4640   -2.8087    0.0000 O   0  0  0  0  0  0  0  0  0  0  0  0
   -2.1785    0.0788    0.0000 C   0  0  0  0  0  0  0  0  0  0  0  0
   -4.3219   -1.9837    0.0000 O   0  0  0  0  0  0  0  0  0  0  0  0
    2.1785    0.7462    0.0000 H   0  0  0  0  0  0  0  0  0  0  0  0
    2.8930    2.8087    0.0000 C   0  0  0  0  0  0  0  0  0  0  0  0
   -2.1793    0.4913    0.0000 O   0  0  0  0  0  0  0  0  0  0  0  0
   -2.8938    1.7288    0.0000 O   0  0  0  0  0  0  0  0  0  0  0  0
   -2.8938    0.9038    0.0000 C   0  0  0  0  0  0  0  0  0  0  0  0
   -3.6083    0.4913    0.0000 C   0  0  0  0  0  0  0  0  0  0  0  0
  1  2  1  0      
  2  3  1  0      
  3  4  1  0      
  4  5  1  0      
  5  6  1  0      
  6  1  1  0      
  4  7  1  0      
  7  8  1  0      
  8  9  1  0      
  9 10  1  0      
 10  5  1  0      
  9 11  1  0      
 11 12  1  0      
 12 13  1  0      
 13 14  1  0      
 14 10  1  0      
 11 15  1  0      
 15 16  1  0      
 16 17  1  0      
 17 12  1  0      
 17 18  1  0      
 18 19  1  0      
 20 19  2  0      
 21 22  1  0      
 22 23  1  0      
 23 20  1  0      
 22 24  4  0      
 18 25  1  0      
 17 26  1  6      
 12 27  1  1      
  9 28  1  1      
 11 29  1  6      
 10 30  1  6      
  4 31  1  6      
  7 32  1  1      
  5 33  1  1      
  2 34  1  1      
 20 35  1  0      
 23 36  1  6      
 14 37  1  6      
 37 39  1  0      
 38 39  2  0      
 39 40  1  0      
M  STY  1   1 SUP
M  SLB  1   1   1
M  SAL   1  4  37  38  39  40
M  SBL   1  1  40
M  SMT   1 OAc
M  SBV   1 40   -8.1664    5.6888
M  END
