# Supplementary material for: Bioactive Polyoxygenated Steroids from the South China Sea Soft Coral, Sarcophyton sp
Source: MDPI journal article supplement (doi:10.3390/md11030775), 2013-03-11
Supplement: s6 [file s6]

marinedrugs-11-00775-s003.mol
  corina  04161404283D 1   1.00000     0.00000 
CORINA 3.49 0023  12.04.2013
 36 39  0  0  0  0  0  0  0  0999 V2000
    0.4580    2.2475    2.6723 C   0  0  0  0  0  0  0  0  0  0  0  0
    0.1488    0.7791    2.3735 C   0  0  0  0  0  0  0  0  0  0  0  0
    0.8819   -0.1109    3.3793 C   0  0  0  0  0  0  0  0  0  0  0  0
    2.3890    0.1258    3.2651 C   0  0  0  0  0  0  0  0  0  0  0  0
    2.7000    1.5941    3.5631 C   0  0  0  0  0  0  0  0  0  0  0  0
    1.9652    2.4844    2.5586 C   0  0  0  0  0  0  0  0  0  0  0  0
    3.1237   -0.7661    4.2675 C   0  0  0  0  0  0  0  0  0  0  0  0
    4.6310   -0.5290    4.1541 C   0  0  0  0  0  0  0  0  0  0  0  0
    4.9399    0.9375    4.4585 C   0  0  0  0  0  0  0  0  0  0  0  0
    4.2064    1.8288    3.4443 C   0  0  0  0  0  0  0  0  0  0  0  0
    6.4253    1.2067    4.3021 C   0  0  0  0  0  0  0  0  0  0  0  0
    6.6616    2.6858    4.7113 C   0  0  0  0  0  0  0  0  0  0  0  0
    6.0400    3.5605    3.6413 C   0  0  0  0  0  0  0  0  0  0  0  0
    4.5236    3.3042    3.6637 C   0  0  0  0  0  0  0  0  0  0  0  0
    7.3414    0.4749    5.2911 C   0  0  0  0  0  0  0  0  0  0  0  0
    8.6027    1.3812    5.3147 C   0  0  0  0  0  0  0  0  0  0  0  0
    8.1497    2.7710    4.8791 C   0  0  0  0  0  0  0  0  0  0  0  0
    8.9058    3.8240    4.6904 C   0  0  0  0  0  0  0  0  0  0  0  0
   10.3961    3.7275    4.8921 C   0  0  0  0  0  0  0  0  0  0  0  0
   11.0757    3.4516    3.5493 C   0  0  0  0  0  0  0  0  0  0  0  0
   12.5449    1.7253    1.7694 C   0  0  0  0  0  0  0  0  0  0  0  0
   13.2454    2.9120    2.4342 C   0  0  0  0  0  0  0  0  0  0  0  0
   12.5710    3.2175    3.7731 C   0  0  0  0  0  0  0  0  0  0  0  0
   14.7172    2.5679    2.6712 C   0  0  0  0  0  0  0  0  0  0  0  0
    8.2853    5.1320    4.2716 C   0  0  0  0  0  0  0  0  0  0  0  0
    5.9863    2.9607    6.0564 C   0  0  0  0  0  0  0  0  0  0  0  0
    4.6107    1.1811    5.4686 H   0  0  0  0  0  0  0  0  0  0  0  0
    6.7377    1.0378    3.2716 H   0  0  0  0  0  0  0  0  0  0  0  0
    4.5271    1.5562    2.4389 H   0  0  0  0  0  0  0  0  0  0  0  0
    2.8216   -0.1928    1.9409 O   0  0  0  0  0  0  0  0  0  0  0  0
    2.6904   -0.4506    5.5922 O   0  0  0  0  0  0  0  0  0  0  0  0
    2.2386    1.9360    4.9813 C   0  0  0  0  0  0  0  0  0  0  0  0
   -1.2590    0.5577    2.4790 O   0  0  0  0  0  0  0  0  0  0  0  0
   13.1976    4.4720    4.3852 C   0  0  0  0  0  0  0  0  0  0  0  0
    7.6645   -0.8320    4.8121 O   0  0  0  0  0  0  0  0  0  0  0  0
   10.8806    4.6533    2.6226 C   0  0  0  0  0  0  0  0  0  0  0  0
  1  2  1  0      
  2  3  1  0      
  3  4  1  0      
  4  5  1  0      
  5  6  1  0      
  6  1  1  0      
  4  7  1  0      
  7  8  1  0      
  8  9  1  0      
  9 10  1  0      
 10  5  1  0      
  9 11  1  0      
 11 12  1  0      
 12 13  1  0      
 13 14  1  0      
 14 10  1  0      
 11 15  1  0      
 15 16  1  0      
 16 17  1  0      
 17 12  1  0      
 17 18  2  0      
 18 19  1  0      
 20 19  1  0      
 21 22  1  0      
 22 23  1  0      
 23 20  1  0      
 22 24  1  0      
 18 25  1  0      
 12 26  1  0      
  9 27  1  0      
 11 28  1  0      
 10 29  1  0      
  4 30  1  0      
  7 31  1  0      
  5 32  1  0      
  2 33  1  0      
 23 34  1  0      
 15 35  1  0      
 20 36  1  0      
M  END
$$$$
