# Supplementary material for: Bioactive Polyoxygenated Steroids from the South China Sea Soft Coral, Sarcophyton sp
Source: MDPI journal article supplement (doi:10.3390/md11030775), 2013-03-11
Supplement: s8 [file s8]

marinedrugs-11-00775-s004.mol
  corina  04161404293D 1   1.00000     0.00000 
CORINA 3.49 0023  12.04.2013
 39 42  0  0  0  0  0  0  0  0999 V2000
    0.1644    2.1650   -0.1372 C   0  0  0  0  0  0  0  0  0  0  0  0
   -0.1461    0.6822   -0.3517 C   0  0  0  0  0  0  0  0  0  0  0  0
    0.3363   -0.1194    0.8590 C   0  0  0  0  0  0  0  0  0  0  0  0
    1.8457    0.0664    1.0247 C   0  0  0  0  0  0  0  0  0  0  0  0
    2.1577    1.5491    1.2388 C   0  0  0  0  0  0  0  0  0  0  0  0
    1.6737    2.3513    0.0290 C   0  0  0  0  0  0  0  0  0  0  0  0
    2.3298   -0.7379    2.2325 C   0  0  0  0  0  0  0  0  0  0  0  0
    3.8393   -0.5513    2.3991 C   0  0  0  0  0  0  0  0  0  0  0  0
    4.1476    0.9303    2.6196 C   0  0  0  0  0  0  0  0  0  0  0  0
    3.6673    1.7324    1.4002 C   0  0  0  0  0  0  0  0  0  0  0  0
    5.6446    1.1461    2.7380 C   0  0  0  0  0  0  0  0  0  0  0  0
    5.8630    2.6525    3.0452 C   0  0  0  0  0  0  0  0  0  0  0  0
    5.5031    3.4280    1.7933 C   0  0  0  0  0  0  0  0  0  0  0  0
    4.0017    3.2138    1.5375 C   0  0  0  0  0  0  0  0  0  0  0  0
    6.3232    0.4828    3.9413 C   0  0  0  0  0  0  0  0  0  0  0  0
    7.6130    1.3290    4.1228 C   0  0  0  0  0  0  0  0  0  0  0  0
    7.3211    2.7118    3.4884 C   0  0  0  0  0  0  0  0  0  0  0  0
    7.5159    3.8216    4.5234 C   0  0  0  0  0  0  0  0  0  0  0  0
    8.9686    3.8221    5.0034 C   0  0  0  0  0  0  0  0  0  0  0  0
    9.1342    4.8474    6.1269 C   0  0  0  0  0  0  0  0  0  0  0  0
   10.4540    7.3105    7.0069 C   0  0  0  0  0  0  0  0  0  0  0  0
   10.7817    5.9577    7.6420 C   0  0  0  0  0  0  0  0  0  0  0  0
   10.5869    4.8478    6.6070 C   0  0  0  0  0  0  0  0  0  0  0  0
   12.2344    5.9581    8.1220 C   0  0  0  0  0  0  0  0  0  0  0  0
    7.1882    5.1745    3.8883 C   0  0  0  0  0  0  0  0  0  0  0  0
    4.9543    3.0821    4.1987 C   0  0  0  0  0  0  0  0  0  0  0  0
    3.6379    1.2828    3.5163 H   0  0  0  0  0  0  0  0  0  0  0  0
    6.1419    0.8707    1.8080 H   0  0  0  0  0  0  0  0  0  0  0  0
    4.1656    1.3508    0.5090 H   0  0  0  0  0  0  0  0  0  0  0  0
    2.5137   -0.3954   -0.1511 O   0  0  0  0  0  0  0  0  0  0  0  0
    1.6606   -0.2796    3.4090 O   0  0  0  0  0  0  0  0  0  0  0  0
    1.4441    2.0443    2.4984 C   0  0  0  0  0  0  0  0  0  0  0  0
   -1.5559    0.5082   -0.5074 O   0  0  0  0  0  0  0  0  0  0  0  0
   10.9146    3.4950    7.2421 C   0  0  0  0  0  0  0  0  0  0  0  0
    6.6481   -0.8783    3.6518 O   0  0  0  0  0  0  0  0  0  0  0  0
    7.9706    2.8777    2.6289 H   0  0  0  0  0  0  0  0  0  0  0  0
    5.7062    4.4884    1.9428 H   0  0  0  0  0  0  0  0  0  0  0  0
    3.6311    3.8903    0.3346 O   0  0  0  0  0  0  0  0  0  0  0  0
    2.3427    1.8903   -1.1466 O   0  0  0  0  0  0  0  0  0  0  0  0
  1  2  1  0      
  2  3  1  0      
  3  4  1  0      
  4  5  1  0      
  5  6  1  0      
  6  1  1  0      
  4  7  1  0      
  7  8  1  0      
  8  9  1  0      
  9 10  1  0      
 10  5  1  0      
  9 11  1  0      
 11 12  1  0      
 12 13  1  0      
 13 14  1  0      
 14 10  1  0      
 11 15  1  0      
 15 16  1  0      
 16 17  1  0      
 17 12  1  0      
 17 18  1  0      
 18 19  1  0      
 20 19  1  0      
 21 22  1  0      
 22 23  1  0      
 23 20  1  0      
 22 24  1  0      
 18 25  1  0      
 12 26  1  0      
  9 27  1  0      
 11 28  1  0      
 10 29  1  0      
  4 30  1  0      
  7 31  1  0      
  5 32  1  0      
  2 33  1  0      
 23 34  1  0      
 15 35  1  0      
 17 36  1  0      
 13 37  1  0      
 14 38  1  0      
  6 39  1  0      
M  END
$$$$
