# Supplementary material for: Bioactive Polyoxygenated Steroids from the South China Sea Soft Coral, Sarcophyton sp
Source: MDPI journal article supplement (doi:10.3390/md11030775), 2013-03-11
Supplement: s10 [file s10]

marinedrugs-11-00775-s005.mol
  corina  04161404293D 1   1.00000     0.00000 
CORINA 3.49 0023  12.04.2013
 43 47  0  0  0  0  0  0  0  0999 V2000
   -0.0084    2.2737   -1.6297 C   0  0  0  0  0  0  0  0  0  0  0  0
   -0.4687    0.8167   -1.5510 C   0  0  0  0  0  0  0  0  0  0  0  0
   -0.3500    0.3225   -0.1077 C   0  0  0  0  0  0  0  0  0  0  0  0
    1.1074    0.4218    0.3466 C   0  0  0  0  0  0  0  0  0  0  0  0
    1.5693    1.8785    0.2678 C   0  0  0  0  0  0  0  0  0  0  0  0
    1.4489    2.3736   -1.1751 C   0  0  0  0  0  0  0  0  0  0  0  0
    1.2280   -0.0760    1.7881 C   0  0  0  0  0  0  0  0  0  0  0  0
    2.6855    0.0243    2.2432 C   0  0  0  0  0  0  0  0  0  0  0  0
    3.1423    1.4819    2.1698 C   0  0  0  0  0  0  0  0  0  0  0  0
    3.0274    1.9741    0.7187 C   0  0  0  0  0  0  0  0  0  0  0  0
    4.6012    1.5987    2.5695 C   0  0  0  0  0  0  0  0  0  0  0  0
    4.9569    3.1101    2.5519 C   0  0  0  0  0  0  0  0  0  0  0  0
    4.9617    3.5584    1.1037 C   0  0  0  0  0  0  0  0  0  0  0  0
    3.5261    3.4077    0.5728 C   0  0  0  0  0  0  0  0  0  0  0  0
    4.9307    1.2197    4.0174 C   0  0  0  0  0  0  0  0  0  0  0  0
    6.2615    1.9761    4.2803 C   0  0  0  0  0  0  0  0  0  0  0  0
    6.2922    3.1643    3.2868 C   0  0  0  0  0  0  0  0  0  0  0  0
    6.4266    4.4862    4.0453 C   0  0  0  0  0  0  0  0  0  0  0  0
    7.7161    4.4730    4.8687 C   0  0  0  0  0  0  0  0  0  0  0  0
    7.7569    5.3359    6.1314 C   0  0  0  0  0  0  0  0  0  0  0  0
    4.8099    4.3172    6.3194 C   0  0  0  0  0  0  0  0  0  0  0  0
    5.5341    5.2720    7.2706 C   0  0  0  0  0  0  0  0  0  0  0  0
    6.5051    6.1461    6.4742 C   0  0  0  0  0  0  0  0  0  0  0  0
    4.5099    6.1616    7.9779 C   0  0  0  0  0  0  0  0  0  0  0  0
    6.4708    5.6448    3.0470 C   0  0  0  0  0  0  0  0  0  0  0  0
    3.9042    3.8984    3.3338 C   0  0  0  0  0  0  0  0  0  0  0  0
    2.5174    2.0966    2.8177 H   0  0  0  0  0  0  0  0  0  0  0  0
    5.2311    1.0506    1.8690 H   0  0  0  0  0  0  0  0  0  0  0  0
    3.6362    1.3339    0.0803 H   0  0  0  0  0  0  0  0  0  0  0  0
    1.9266   -0.3837   -0.5032 O   0  0  0  0  0  0  0  0  0  0  0  0
    0.4072    0.7264    2.6392 O   0  0  0  0  0  0  0  0  0  0  0  0
    0.6939    2.7416    1.1785 C   0  0  0  0  0  0  0  0  0  0  0  0
   -1.8298    0.7233   -1.9761 O   0  0  0  0  0  0  0  0  0  0  0  0
    6.8994    7.3641    7.3119 C   0  0  0  0  0  0  0  0  0  0  0  0
    7.1159    3.0466    2.5826 H   0  0  0  0  0  0  0  0  0  0  0  0
    5.8499    2.7367    0.3434 O   0  0  0  0  0  0  0  0  0  0  0  0
    2.0745    1.7598   -1.8231 H   0  0  0  0  0  0  0  0  0  0  0  0
    7.6667    3.8131    6.2481 C   0  0  0  0  0  0  0  0  0  0  0  0
    9.0892    5.9950    6.4939 C   0  0  0  0  0  0  0  0  0  0  0  0
    3.4968    3.7804   -0.8303 O   0  0  0  0  0  0  0  0  0  0  0  0
    3.0692    5.8604   -0.2184 O   0  0  0  0  0  0  0  0  0  0  0  0
    3.2525    5.0696   -1.1134 C   0  0  0  0  0  0  0  0  0  0  0  0
    3.2068    5.5306   -2.5474 C   0  0  0  0  0  0  0  0  0  0  0  0
  1  2  1  0      
  2  3  1  0      
  3  4  1  0      
  4  5  1  0      
  5  6  1  0      
  6  1  1  0      
  4  7  1  0      
  7  8  1  0      
  8  9  1  0      
  9 10  1  0      
 10  5  1  0      
  9 11  1  0      
 11 12  1  0      
 12 13  1  0      
 13 14  1  0      
 14 10  1  0      
 11 15  1  0      
 15 16  1  0      
 16 17  1  0      
 17 12  1  0      
 17 18  1  0      
 18 19  1  0      
 20 19  1  0      
 21 22  1  0      
 22 23  1  0      
 23 20  1  0      
 22 24  1  0      
 18 25  1  0      
 12 26  1  0      
  9 27  1  0      
 11 28  1  0      
 10 29  1  0      
  4 30  1  0      
  7 31  1  0      
  5 32  1  0      
  2 33  1  0      
 23 34  1  0      
 17 35  1  0      
 13 36  1  0      
  6 37  1  0      
 19 38  1  0      
 38 20  1  0      
 20 39  1  0      
 14 40  1  0      
 40 42  1  0      
 41 42  2  0      
 42 43  1  0      
M  STY  1   1 SUP
M  SLB  1   1   1
M  SAL   1  4  40  41  42  43
M  SBL   1  1  44
M  SMT   1 OAc
M  SBV   1 44   -8.4139    6.7819
M  END
$$$$
